# Supplementary material for: Expression of distal limb patterning genes in Hypsibius exemplaris indicate regionalization and suggest distal identity of tardigrade legs
Source: PubMed Central journal article supplement — EvoDevo. 2024 Nov 13;15:15. doi: 10.1186/s13227-024-00235-1 (PMC11562647; doi:10.1186/s13227-024-00235-1), 2024-11-13
Supplement: 13227_2024_235_MOESM1_ESM.pdf [file 13227_2024_235_MOESM1_ESM.pdf]

## Steps for obtaining the candidate homologs in *Hypsibius exemplaris*

### Step 1: Obtaining the first set of candidate genes using HMMER

#### a. building HMMs

```
hmmbuild <hmm output file> <input file>
```

→ used the *Drosophila melanogaster* protein isoforms.

#### b. HMMER search

```
esl-sfetch --index <database>
```

→ indexing the *H. exemplaris* predicted protein sequences as a database

```
hmmsearch -E 10e-6 --tblout <output file#1> <query> <database>
```

→ the output file will be in a table format (.tblout) with names of the genes from the database

```
grep -v "^#" <output file#1> | awk '{print $1}' | esl-sfetch -f <database> -> <output file#2>
```

→ using the names of the genes from output file#1, the sequences will be obtained ("fetched") from the *H. exemplaris* predicted protein sequences database

### Step 2: Obtaining the second set of candidate genes using BLASTp

#### a. building database for BLASTp search

```
makeblastdb -dbtype prot -in <input file> -out <output file#2>
```

→ making the 1<sup>st</sup> set of candidate gene as a database for the BLASTp search

```
esl-sfetch --index <output file #2>
```

→ indexing the 1<sup>st</sup> set of candidate gene so it can be used for the esl-sfetch command later

#### b. BLASTp search

```
blastp -db <output file#2> -query <input file> -evalue 10e-6 -outfmt 6 | awk '{print $2}' | uniq |  
esl-sfetch -f <output file#2> -> <output file #3>
```

→ only hits with an e-value less than  $10^{-6}$  were retained. The query (input file) used here is the same input file used for building HMMs in Step 1a (i.e., the *D. melanogaster* protein isoform).

### Step 3: Obtaining the third set of candidate genes using BLASTp (reciprocal BLAST)

This step used the online BLASTp search (<https://blast.ncbi.nlm.nih.gov/Blast.cgi>) wherein the 2<sup>nd</sup> set of candidate genes is used as query against the *D. melanogaster* protein database (taxid: 7227). To be retained, hits must have a max score greater than 80, a percent identity greater than 20%, and e-value less than  $10^{-6}$ .
