# Supplementary material for: Expression of distal limb patterning genes in Hypsibius exemplaris indicate regionalization and suggest distal identity of tardigrade legs
Source: PubMed Central journal article supplement — EvoDevo. 2024 Nov 13;15:15. doi: 10.1186/s13227-024-00235-1 (PMC11562647; doi:10.1186/s13227-024-00235-1), 2024-11-13
Supplement: 13227_2024_235_MOESM6_ESM.pdf [file 13227_2024_235_MOESM6_ESM.pdf]

stage 16 (45 hpl)

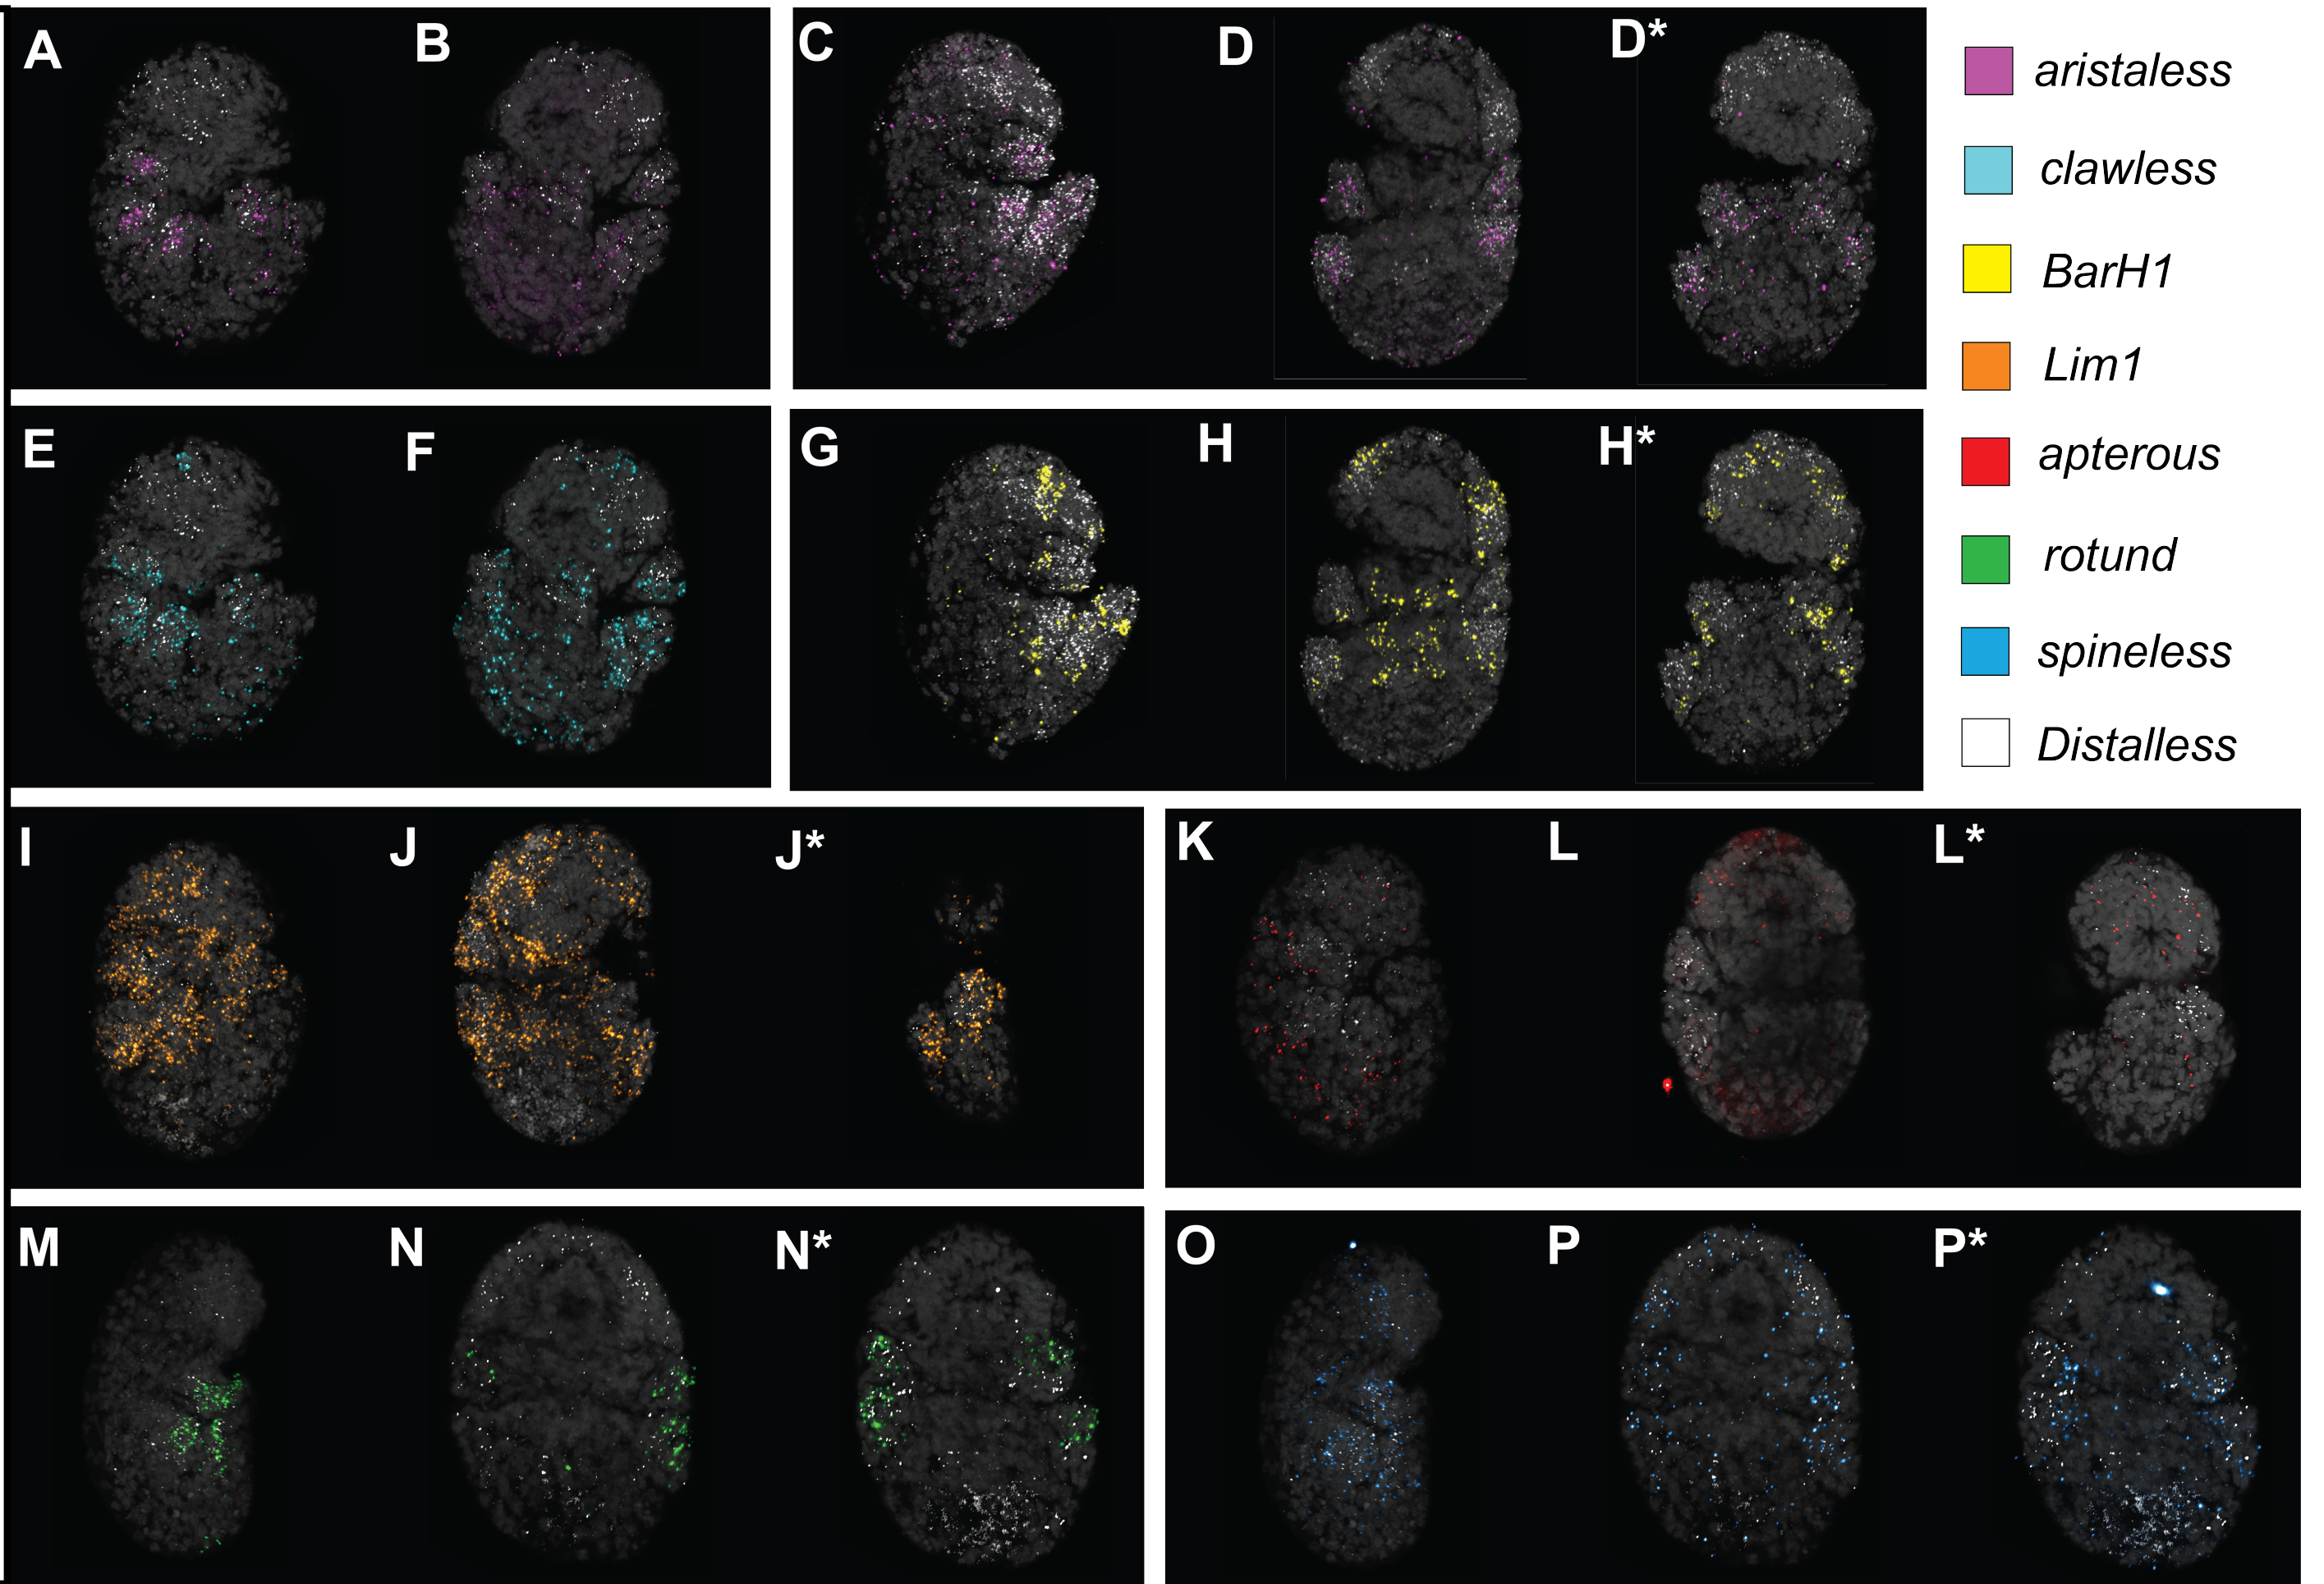

Figure S1. Expression pattern of *Distalless* and seven distal limb patterning genes at stage 16 of development in the eutardigrade *Hypsibius exemplaris*. (A-D) *aristaless*. (E-F) *clawless*. (G-H) *BarH1*. (I-J) *Lim1*. (K-L) *apterous*. (M-N) *rotund*. (O-P) *spineless*. Figures with the same letter indicates the same embryo viewed in similar optical sections; with asterisk (\*) indicate the same embryo but viewed at different optical sections.

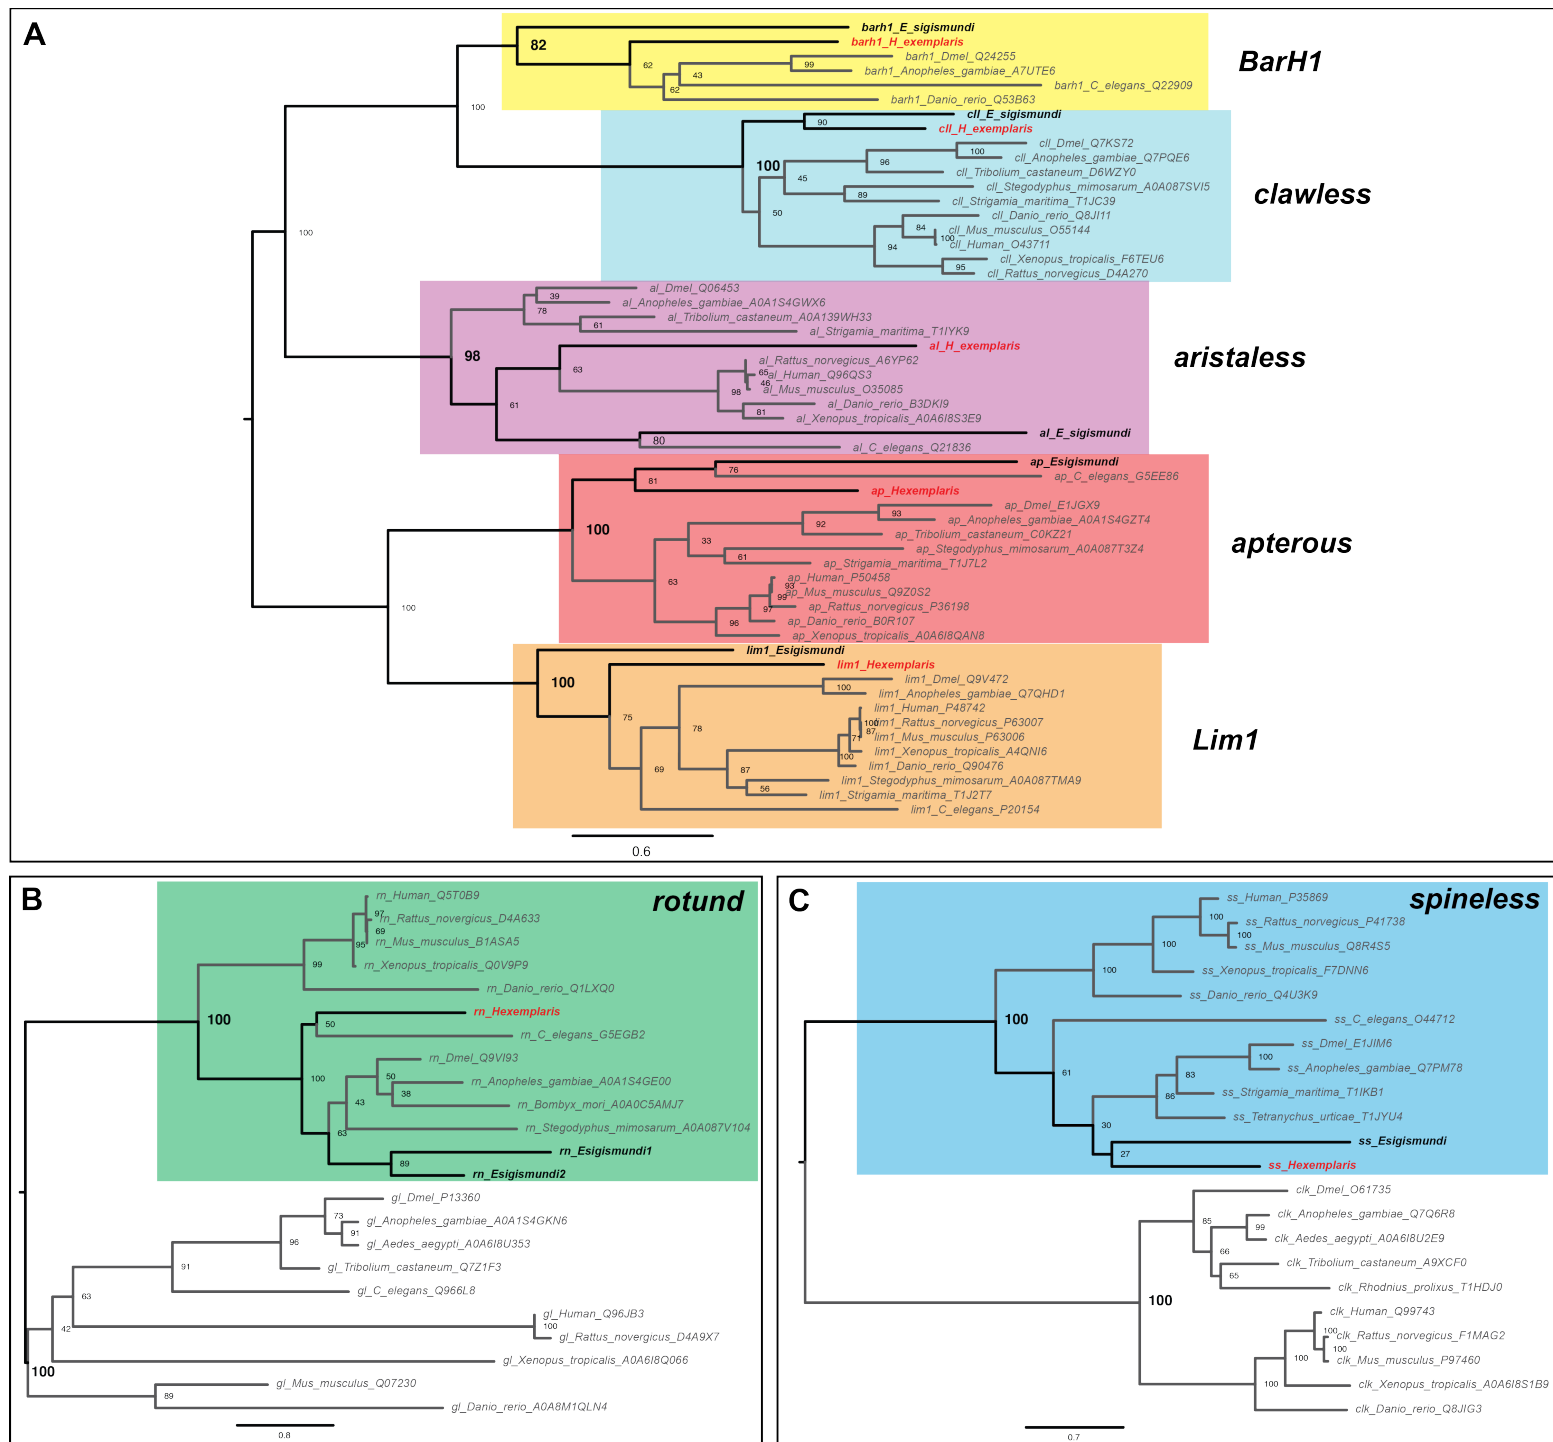

**Figure S2. Phylogenetic results of the maximum likelihood using IQTree. (A) Homeobox-containing genes dataset. (B) *rotund-glass* genes dataset. (C) *spineless-clock* genes dataset. Values on the node represent the posterior probability values. Tardigrade taxa are highlighted in bold**

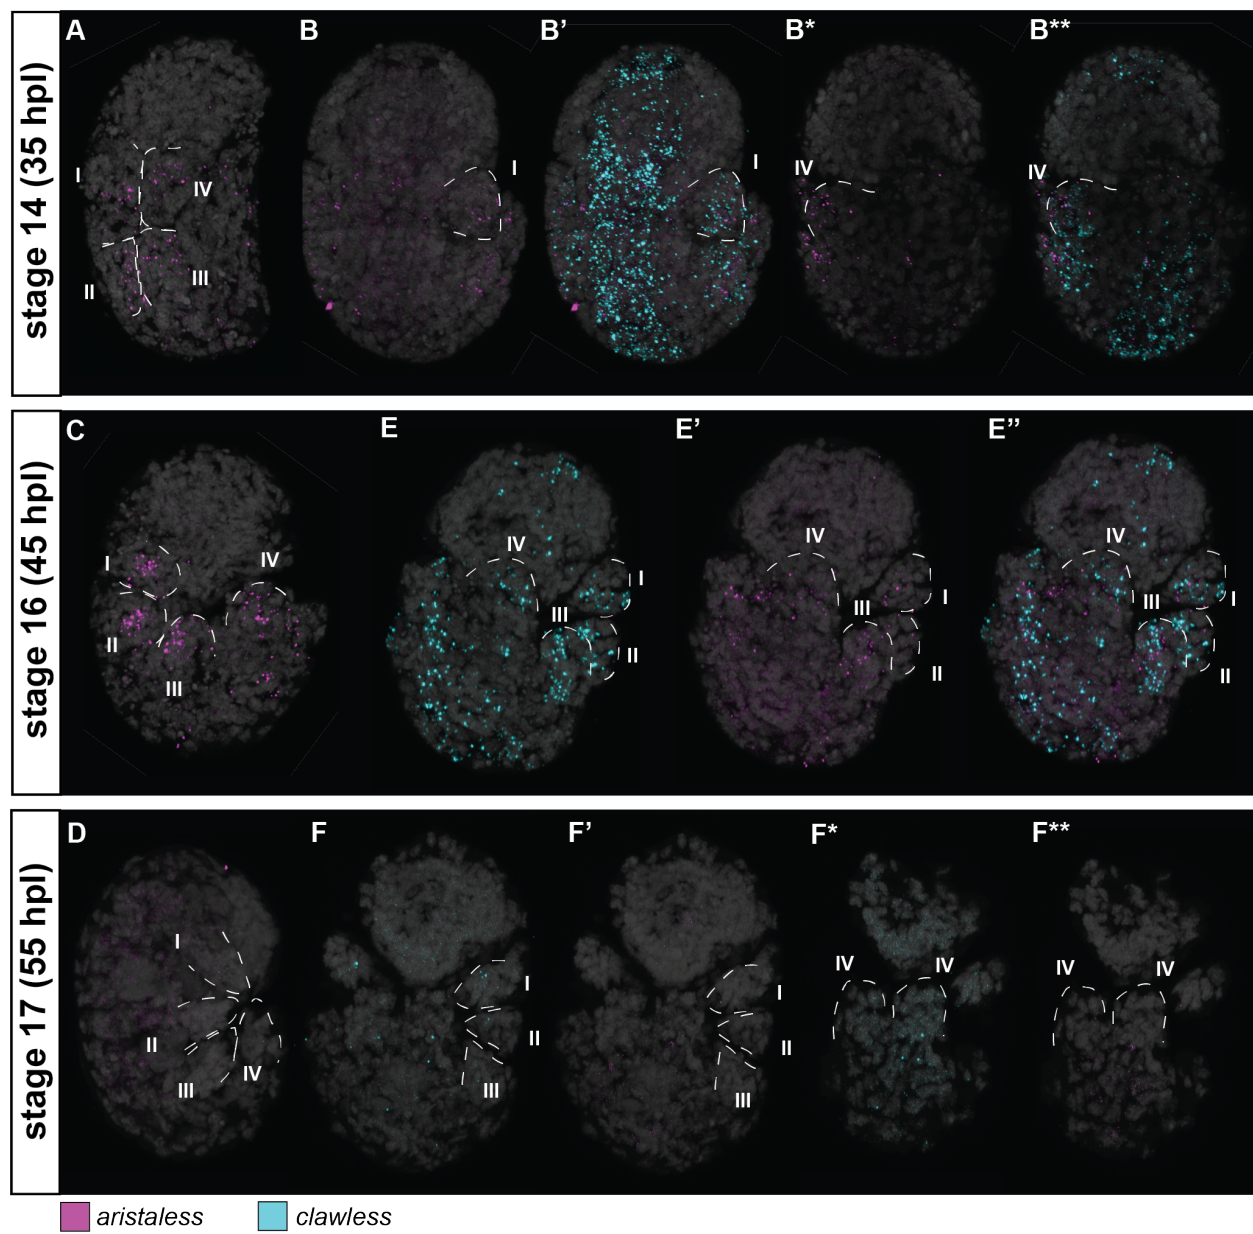

**Figure S3. Expression patterns of *aristaless* and *clawless* at different stages of the eutardigrade *Hypsibius exemplaris* limb development.** (A-B) Stage 14. (C,E) Stage 16. (D,F) Stage 17. (A,B,B\*,C,D,E',F',F\*\*) *al* expression. (E,F,F\*) *cll* expression. (B',B\*\*,E'') *al* and *cll* expression. Figures with the same letter indicates the same embryo viewed in similar optical sections; with asterisk (\*) indicate the same embryo but viewed at different optical sections. Figures with the same letters in the main figures represent the same embryos. Embryos are in dorsoventral mount in all panels, except for A,C, and D, which are in lateral view and facing right. Roman numeral number indicates leg number (e.g., I – 1<sup>st</sup> pair of legs). Nuclei are labeled with DAPI (Gray).

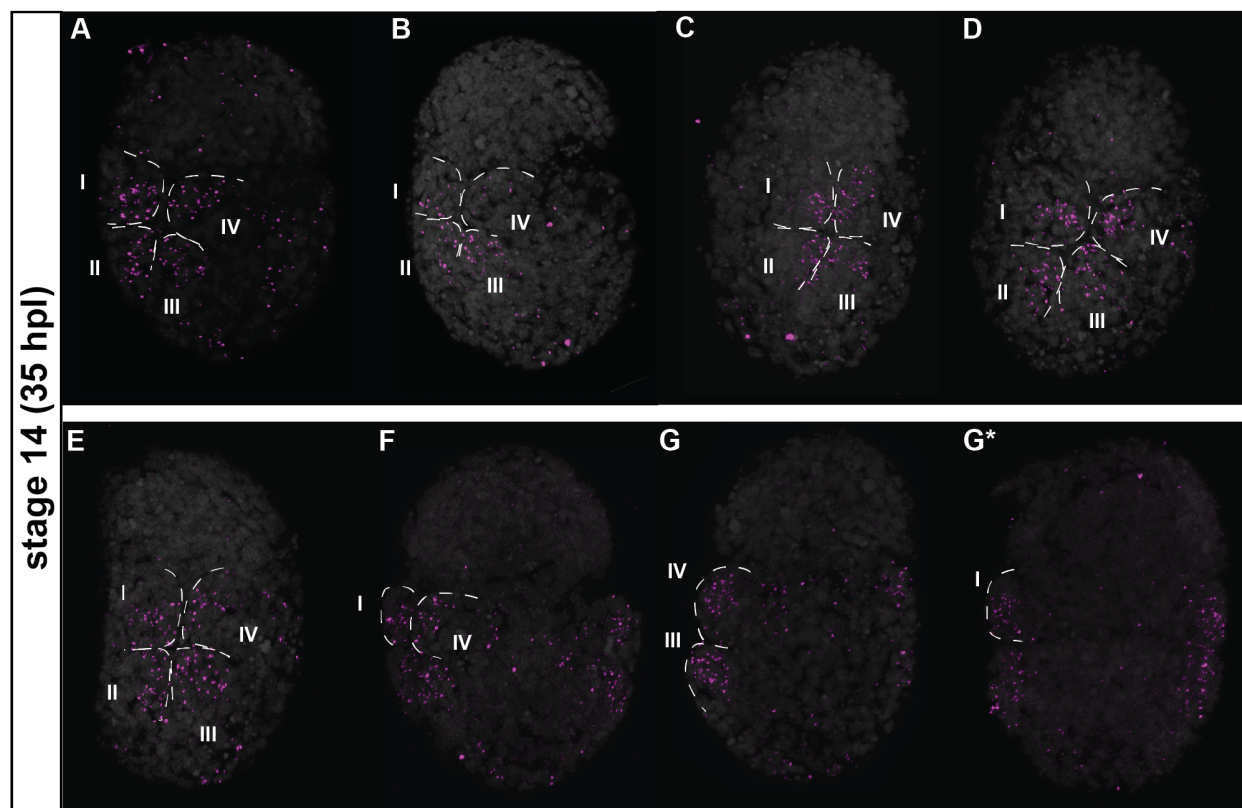

**Figure S4. Expression patterns of *aristaless* at stage 14 of the eutardigrade *Hypsibius exemplaris* limb development.** Embryos A-B viewed similar to all embryos in the paper. Embryos C-G were viewed with Olympus FV1000 Fluoview confocal microscope using 405 nm and 543 nm lasers to visualize DAPI and *aristaless*, respectively. Figures with the same letter and asterisk (\*) indicate the same embryo but viewed at different optical sections. Embryos are in lateral view and facing right in all panels, except for G and G\*, which are in dorsoventral mount. Roman numeral number indicates leg number (e.g., I – 1<sup>st</sup> pair of legs). Nuclei are labeled with DAPI (Gray).

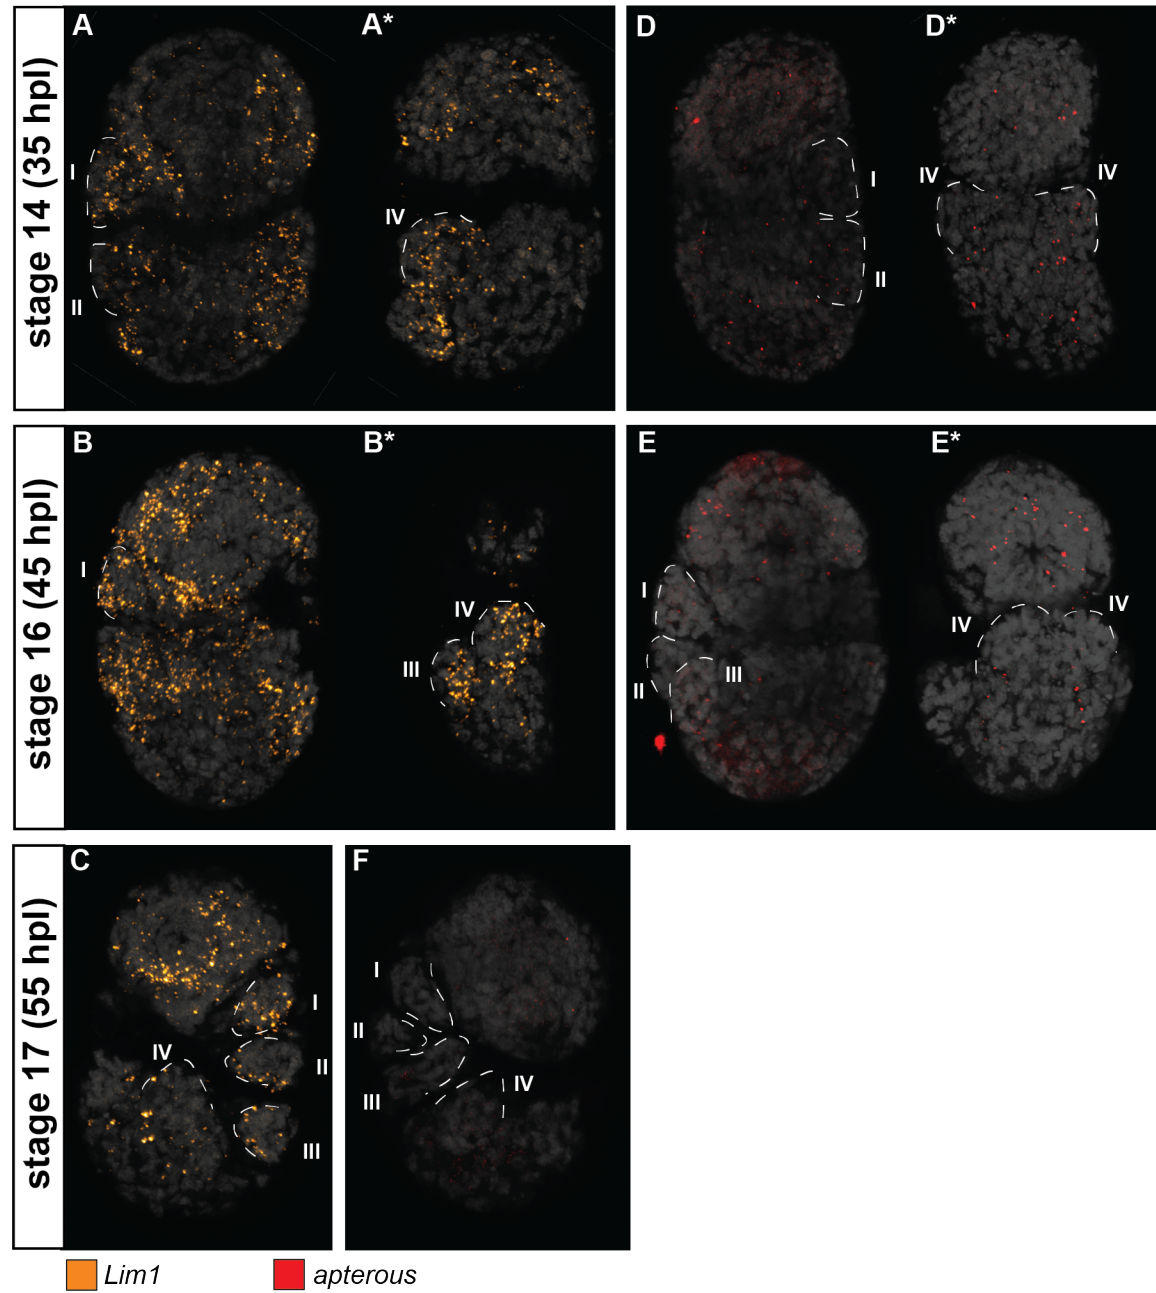

**Figure S5. Expression patterns of *apterous* and *Lim1* at different stages of the eutardigrade *Hypsibius exemplaris* limb development.** (A,D) Stage 14. (B,E) Stage 16. (C,F) Stage 17. (A-C) *Lim1* expression. (D-F) *ap* expression. Figures with the same letter indicates the same embryo viewed in similar optical sections; with asterisk (\*) indicate the same embryo but viewed at different optical sections. Embryos are in dorsoventral mount in all panels, except for F, which is in a dorsolateral view. Roman numeral number indicates leg number (e.g., I – 1<sup>st</sup> pair of legs). Nuclei are labeled with DAPI (Gray).

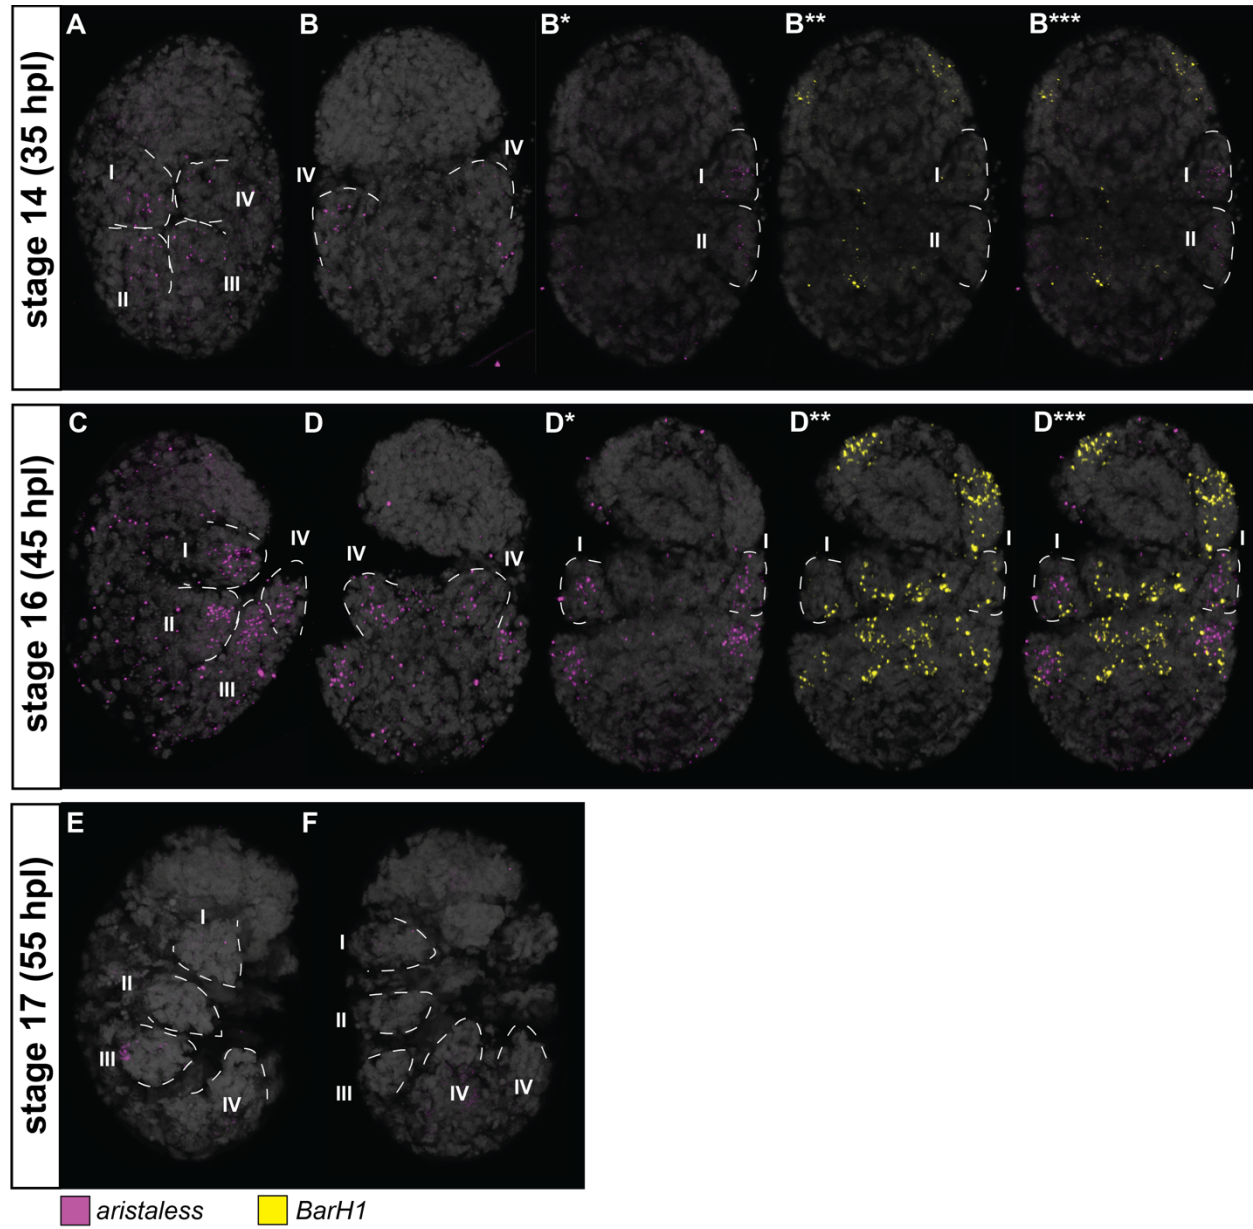

**Figure S6. Expression patterns of *aristaless* and *BarH1* at different stages of the eutardigrade *Hypsibius exemplaris* limb development.** (A-B) Stage 14. (C-D) Stage 16. (E-F) Stage 17. (A,B,B\*,C,D,D\*,E,F) *al* expression. (B\*\*,D\*\*) *BarH1* expression. (B\*\*\*,D\*\*\*) *al* and *BarH1* expression. Figures with the same letter indicates the same embryo viewed in similar optical sections; with asterisk (\*) indicate the same embryo but viewed at different optical sections. Figures with the same letters in the main figures represent the same embryos. Embryos are in dorsoventral mount in all panels, except for A,C, and E, which are in lateral view and facing right. Roman numeral number indicates leg number (e.g., I – 1<sup>st</sup> pair of legs). Nuclei are labeled with DAPI (Gray).

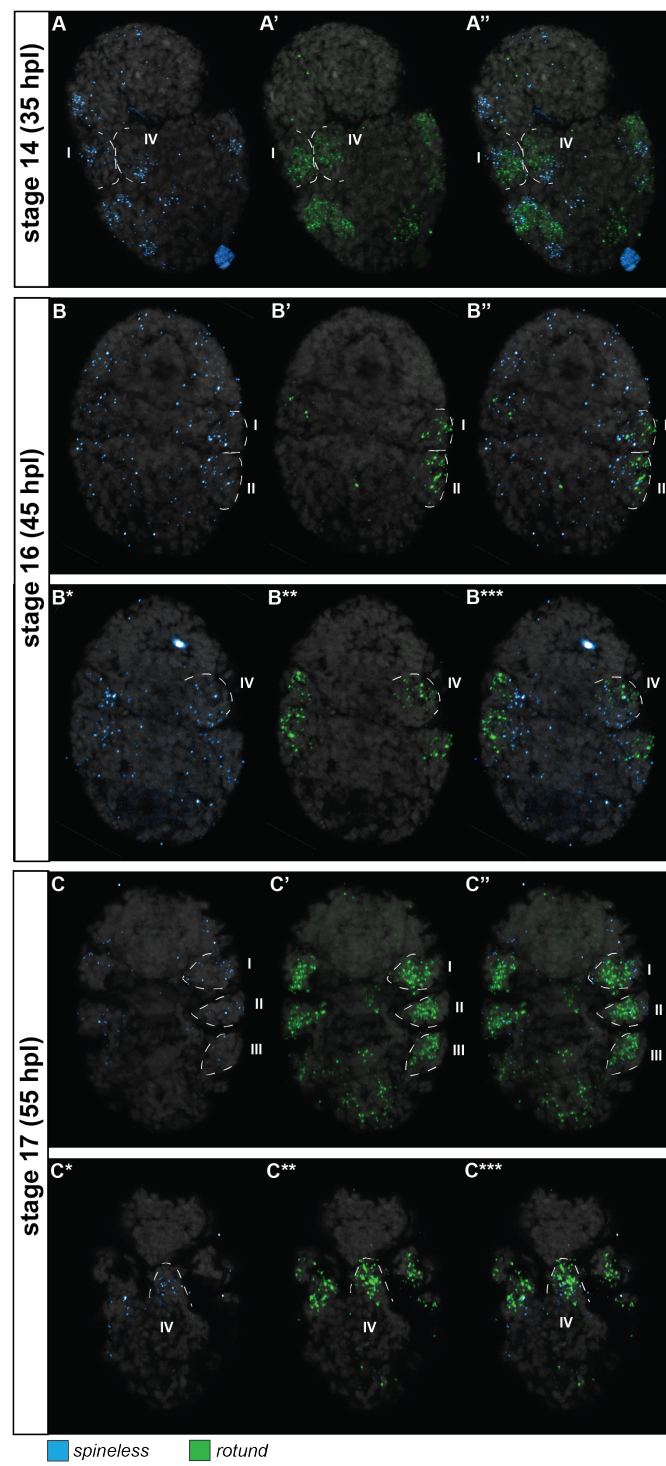

**Figure S7. Expression patterns of *rotund* and *spineless* at different stages of the eutardigrade *Hypsibius exemplaris* limb development.** (A) Stage 14. (B) Stage 16. (C) Stage 17. (A,B,B\*,C,C\*) *ss* expression. (A',B',B\*\*,C',C\*\*) *rn* expression. (A'',B'',B\*\*\*,C'',C\*\*\*) *ss* and *rn* expression. Figures with the same letter indicates the same embryo viewed in similar optical sections; with asterisk (\*) indicate the same embryo but viewed at different optical sections. Embryos are in dorsoventral mount in all panels. Roman numeral number indicates leg number (e.g., I – 1<sup>st</sup> pair of legs). Nuclei are labeled with DAPI (Gray).

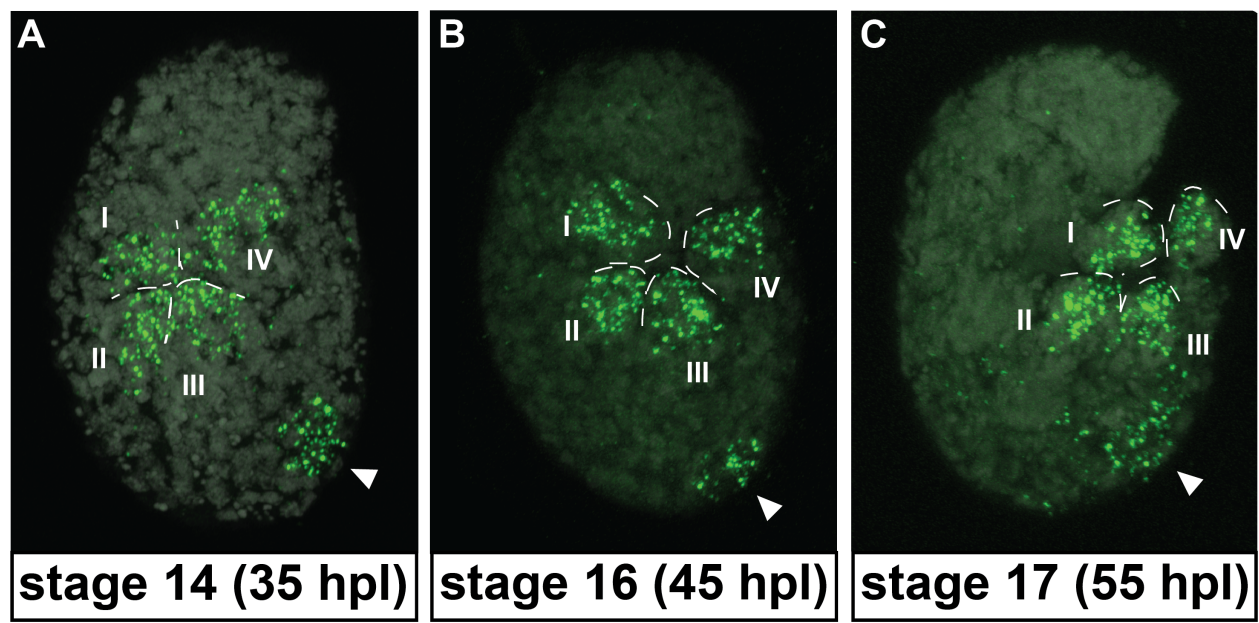

**Figure S8. Expression patterns of *rotund* at different stages of the eutardigrade *Hypsibius exemplaris* limb development.** (A) Stage 14. (B) Stage 16. (C) Stage 17. Embryos are in lateral view and facing right in all panels. Roman numeral number indicates leg number (e.g., I – 1<sup>st</sup> pair of legs). White arrowhead denotes the expression dorsal to the third leg. Nuclei are labeled with DAPI (Gray).



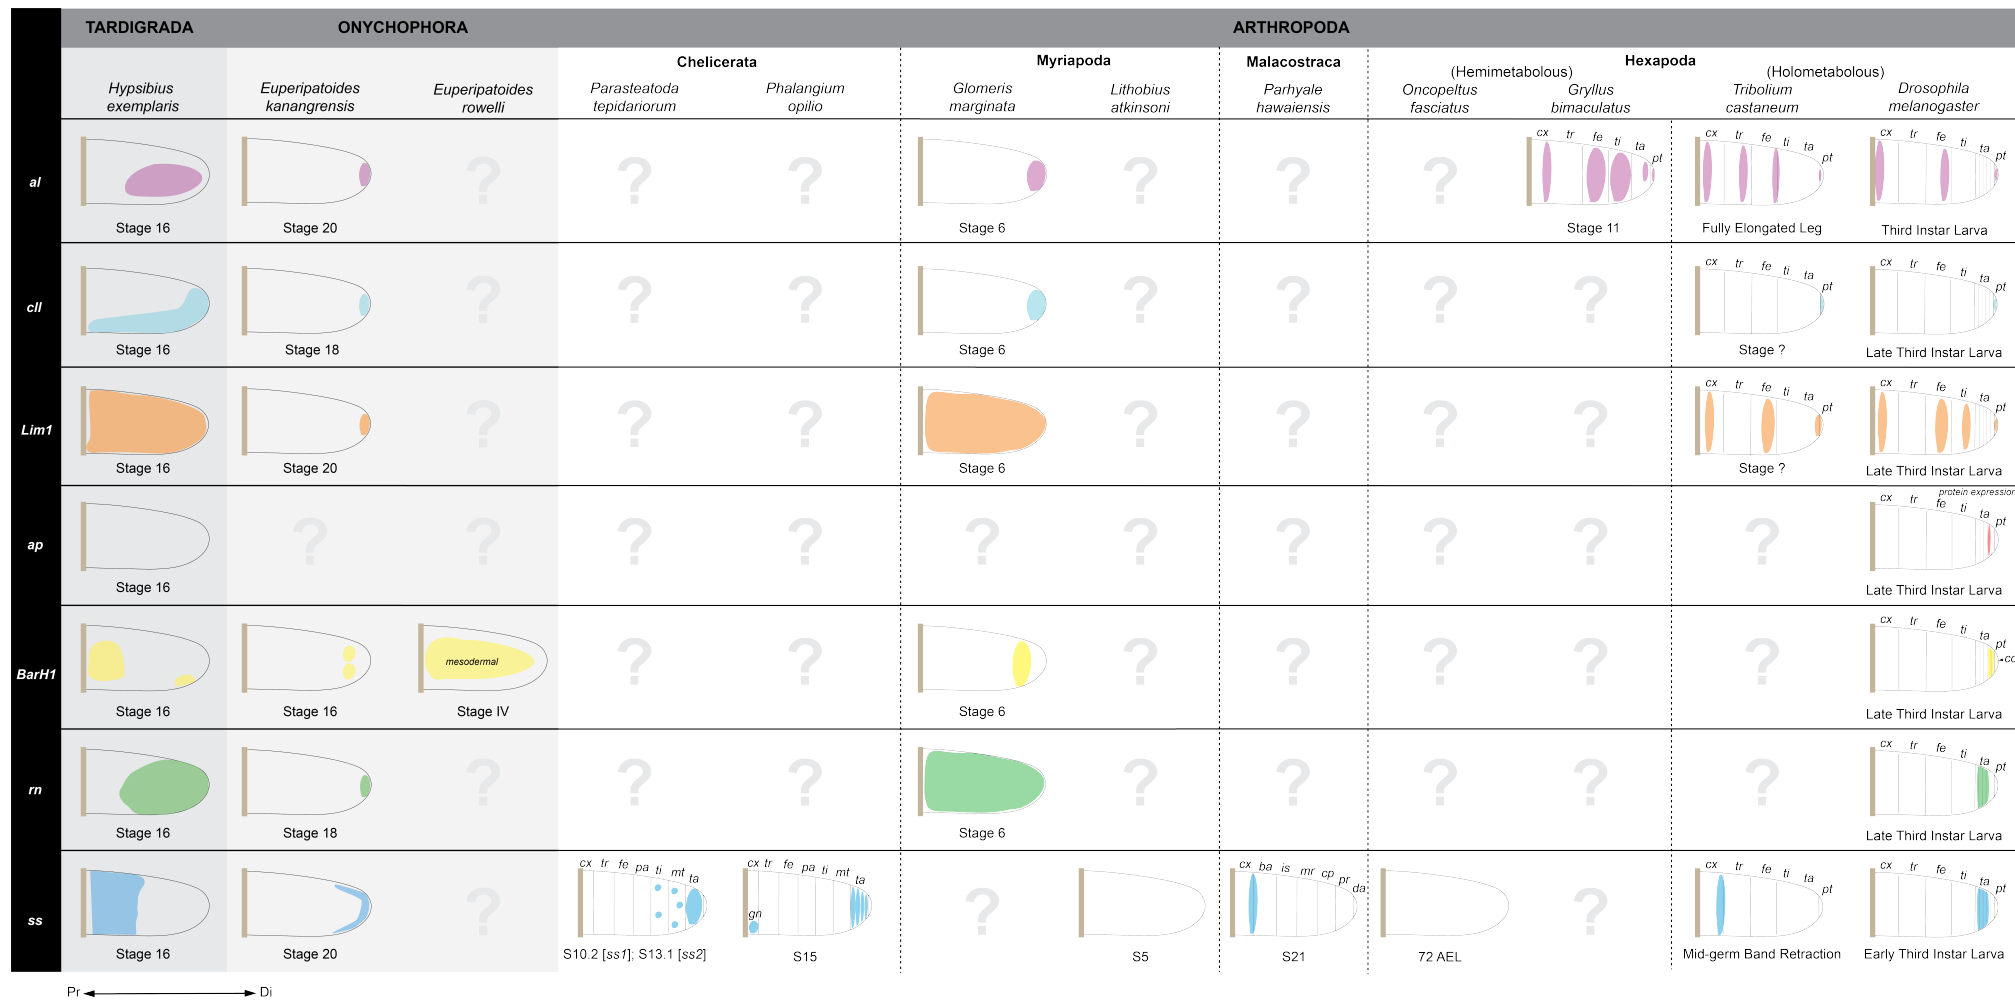

**Figure S9. Expression patterns distal limb patterning genes in the first pair of walking legs of different panarthropods.** Colored diagrams represent RNA expression, unless stated; Brown box represent the body wall; question mark (?) denotes unknown data. Stages when the illustrated expression patterns appeared are indicated. Hexapod and Chelicerata podomere abbreviations: cx – coxa, gn – gnathendite, tr – trochanter, fe – femur, pa – patella, ti – tibia, mt – metatarsus, ta – tarsus, pt – pretarsus, cc – claw cells. Malacostraca podomere abbreviations: cx – coxa, ba -basis, is – ischium, mr – merus, cp – carpus, pr – propodus, da – dactyl. Expression references: *H. exemplaris* (this study); *E. kanangrensis* (Oliveira et al 2014, Janssen 2017); *E. rowelli* (Treffkorn & Mayer 2019); *P. tepidariorum*, *P. opilio*, *L. atkinsoni*, *P. hawaiiensis*, *O. fasciatus* (Setton et al 2017); *G. marginata* (Janssen 2017); *G. bimaculatus* (Miyawaki et al 2002); *T. castaneum* (Beermann & Schröder 2004, Toegel et al 2009, Beermann et al 2011, Grossman & Prpic 2012); *D. melanogaster* (Campbell et al 1993, Duncan et al 1998, Kojima et al 2000, Pueyo et al 2000, Kojima et al 2005, Natori et al 2012).

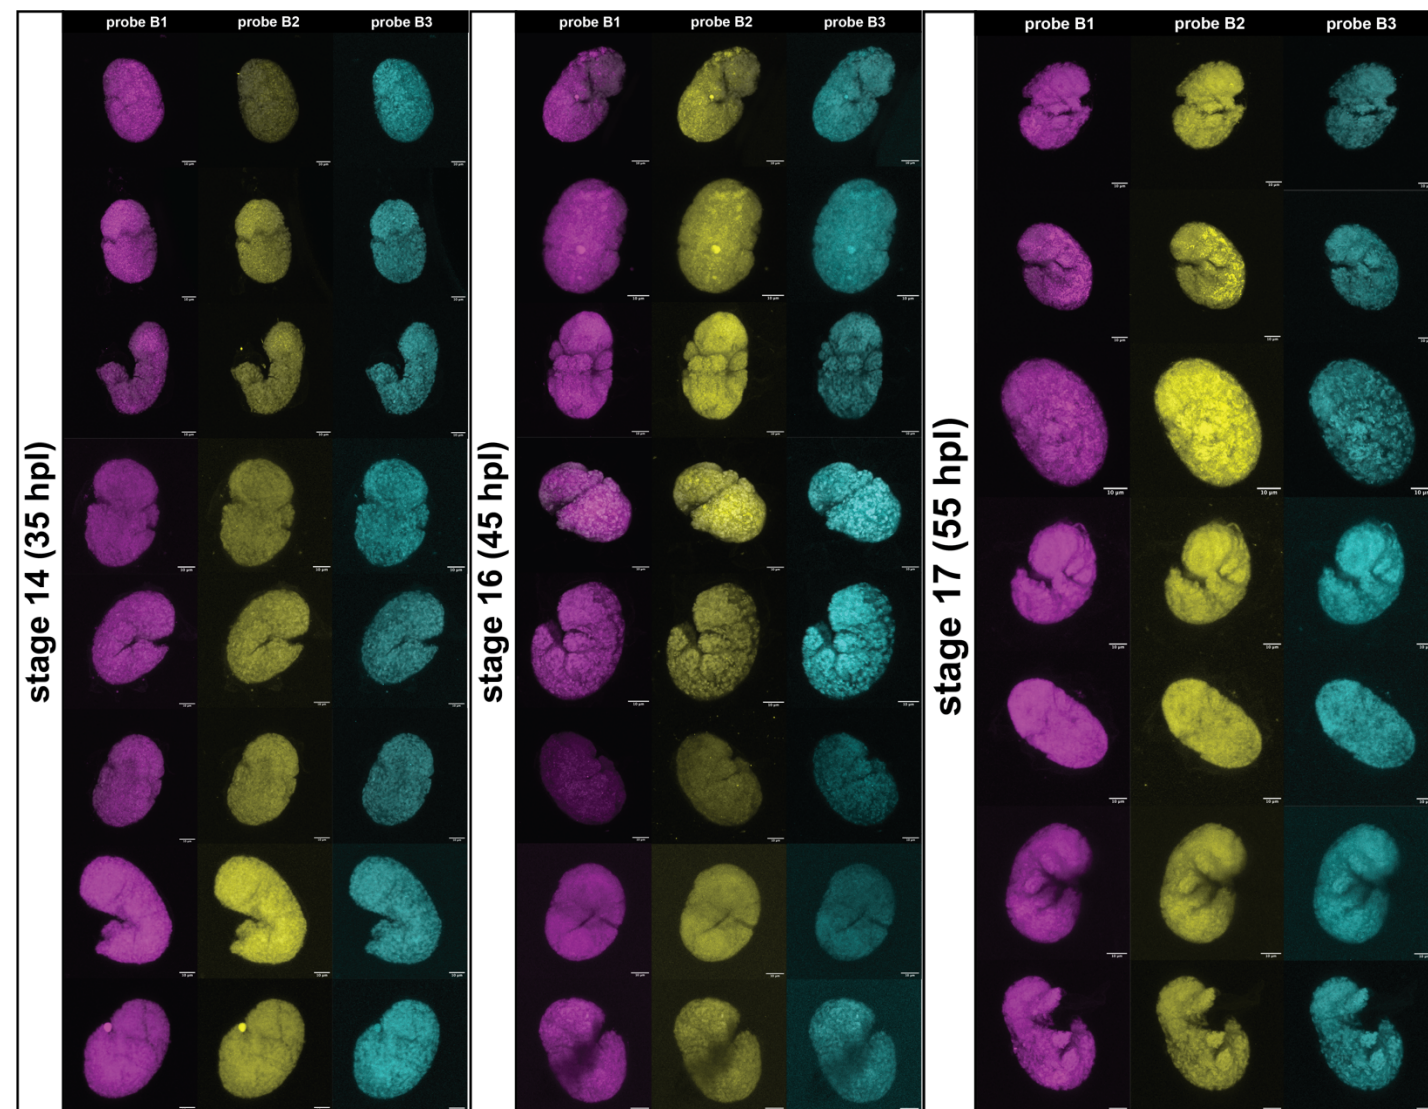

**Figure S10. Negative controls for the different probes used in the *in situ* hybridization experiment in the eutardigrade *Hypsibius exemplaris*.** Gain and detector settings were increased until just below saturation. No patterns were detected. Nuclei are labeled with DAPI (Gray

**Table S1.** Amino acid sequences of *Drosophila melanogaster* distal limb patterning genes used for building profile HMMs

| <b>Protein</b> | <b>Flybase ID</b> |
|----------------|-------------------|
| aristaless-PA  | FBpp0077713       |
| clawless-PA    | FBpp0083510       |
| Lim1-PA        | FBpp0071216       |
| apterous-PA    | FBpp0085394       |
| BarH1-PA       | FBpp0074204       |
| rotund-PG      | FBpp0303173       |
| spineless-PC   | FBpp0297168       |

**Table S2.** Coding sequences of *Hypsibius exemplaris* distal limb patterning gene homologs

| Gene              | Coding Sequence                                                                                                                                                                                                                                                                                                                                                                                                                                                                                                                                                                                                                                                                                                                                                                                                                                                                                                                                                                                                                                                                                                                                                                                                                                                                                                                                                                                                                                                                                                                                                                                                                                                                                                                                                                                                                             |
|-------------------|---------------------------------------------------------------------------------------------------------------------------------------------------------------------------------------------------------------------------------------------------------------------------------------------------------------------------------------------------------------------------------------------------------------------------------------------------------------------------------------------------------------------------------------------------------------------------------------------------------------------------------------------------------------------------------------------------------------------------------------------------------------------------------------------------------------------------------------------------------------------------------------------------------------------------------------------------------------------------------------------------------------------------------------------------------------------------------------------------------------------------------------------------------------------------------------------------------------------------------------------------------------------------------------------------------------------------------------------------------------------------------------------------------------------------------------------------------------------------------------------------------------------------------------------------------------------------------------------------------------------------------------------------------------------------------------------------------------------------------------------------------------------------------------------------------------------------------------------|
| <i>aristaless</i> | ATGGTCGGTCACGACGAGCGTCTAAAAAGGAGAACGACTGTGTCGTGCCTGAACGAATATCCCCGAGCA<br>TCGCTTCAGCCGGGAGTTTGGATGATAAAGAGTCTTCGTCGATGACGACTCGGAGGACTCTGCGTCGTTT<br>GGCGCCGGAGGGCGGAGCAGGAGCCCGGAGTGGCGCCGGGTGAGCAGCAAACAGCGCCGTTACCGAACT<br>ACCTTCACGGCTTTCCAGCTGCAGGAGCTGGAAAAAGTGTTCGGGAAGACGCATTATCCAGACATTTTAC<br>CAGAGACGAGCTAGCGATGCGAATCCACCTGACCGAGGCGCGCATCCAAGTCTGGTTCCAGAATCGTCGT<br>GCGAAATGGCGCAAGACCGAAAAAGTCTCCGACCCACATCCGATTTCCGGTGTGAGCCAGCCAGCAG<br>TCCAGTCTTCAACACCCATCCCATCCCAACAGCAACTGTCTCTCCAAAGGTACACCGACCCCT<br>TCCTGCAGTACCCGCACGGTCCGTATCCGACACTACACGTCCGGATGAACCCCGGATGGCCGCTCATC<br>CCGCCGTCCAATAAATACAGTGCAGCAGTTTGTACGAGAAATTTCTACCCGGAACAAGCAGCAGCAGCCG<br>CAGCAGCAGCAGCCATGGCCGCCACTACCAACATGTGGAACCAACGCTGGTCCAAACAAATGGCCGTCAA<br>TTCGCTCCTCCATCGGGATGTTCCGCCGCTCTGGACGACACAGACATCGCCCGGATCGGCCGTCTCGCCG<br>CGCATCATTGACCTTCCATCCGGAGTTCCGACCGTTCTTCCATCCTCATCCCAATGGGACAACGACTGCTG<br>GTCAGTTGACCGGTCCAGCGGACTGCTGCTAGTGGACCGGTCCCGCGTGTACTGCTGACGCGATGACG<br>AAATACGGAGCGTTTCGATCGATCCGACGGAATGACGGAGGTGGAGGTGGGCGCTGA                                                                                                                                                                                                                                                                                                                                                                                                                                                                                                                                                                                                                                                                                                                                                                                                |
| <i>clawless</i>   | ATGATGGAGAACCCTCCGGCAGCAGTGTCTTCAAGGACCCCTCCTCCAGGTCGCTGTTGCGGAGAAACC<br>TCTGAAAAAGCGTACTCCCTCAGTATCGACAGTATTCTCAGCACAGATACGGACACTTCGCCGAAGGAAG<br>AGTGTCTTCGCCGAGTTTATCCGAGACAAAATGCAGTAAACAACGAGAAATATCCACACGGCGATGGATGCT<br>TATGCGGGCGGGCGGGCGGCTGCAACGACGGCCATGTATTCTCATCGGGCTATTACTCGTCCCCCGCCGA<br>CGCTATAAATTACGGATCGATGGTCAATTCACACGTCTCAAGGTCCCGGCGCAGCGAGTCCAGCAGCAGC<br>AGCAGCAGCAACACTTGGCGCCATGCGGTGGCGTCACTCCTCATCCAGCCCTTTTCGGGATCGGACATCAC<br>GTCGGCATGTCTGCCTACAGTGGATGGACCCCGCCGACGACTTTTGACAAGGAGAATTGGGCATCCCTA<br>CCAGAATAGAACCCTCCCAACGGGAAGAAGCCTCGACTTCTTCCACAGGATTAGATTGCGAATTAG<br>AGAAACGCTTTCACAGACAAAAATATCTAGCGTGGCGGAGCGAGCCTCGCTGGCCAAAGTCTTGAAGAT<br>GACGGATGCTCAGGTCAAACTTGGTTTCAAAACCGACGGACAAAACACAGCGGCAAAACCAACGAAGA<br>GCGGGAAGCGGACCGACAGGCGCCAAATCGGATGCTTTTGTACAGCTGGCCGAAGTGACCAAGACCAGC<br>GGAGCGTATGACAGCACCGACGCGTTATGCCTTAATAATGCTTCCCTTACGCTCTTACAATCTCCGACCG<br>TGGGTCAATGCCGGCAGCGCGGTGGTTCCTCTCCAACAATAATCATCATCCCCACATTATTACTGTCTCT<br>CAGACAAACAGCTTTCACCAACAACAATAACACCAACAACAACTGCAGTAGCCGATGTAGCAGCAGCA<br>GCGAAACAAGTACGAGGAAGAGGACCGTGATGATGATGACAACCGGTCAGAGGTCTCATCAGATGAGG<br>ATGCACTATCCGTCTAA                                                                                                                                                                                                                                                                                                                                                                                                                                                                                                                                                                                                                                                                                |
| <i>Lim1</i>       | ATGCCTGTCCGCCACCGTTATCTTCAGCAACATCCGCAGCCGCCCGCCACCATCATCTCTCGTCCGGGCC<br>GGAAGATTTTCGAGACCAACAACAGGAGGATTGTCTCGGGGAAGATGCAAAATCCCGGTGGGATGTAT<br>GATAAGTGTACAGGCTGTGGAATGGTATTTTGGATCCTTTTATCATGGCCATCGCCACTCCGACGGCCAG<br>TCAGGTTTGGCATGCGGATTGTTTGGCTGTTGTGAGTGCAAGTGCCACTTCAGGAGCGGTGTTTCTGCAA<br>TGGAGGACGCTTTTTTTCGCCGGAAGACTATTTTCAGAGCTTTCGGTACGCGGTGTAAGGGCTGCGCGCTC<br>GGATCGATCCGACGGAAGTGGTGGCGCAGACGCGCGGGAATTTTCAATTTGAAATGTTTATCTGCACG<br>GCATGTCCGAAAACAGTGTCCACCGGGGAAGAATGCTACAACATCGGGGACTGCGAGTTCAACTGCAAGG<br>ACGATTATGTCACCAGCAAACAGCCAAAGCCCTCCTCCACACTGCAATCATTTTCTGCAAAGCAGAG<br>CAATCGTCCCGGGAGCTGTACCTACCCTGTCTGCTCGGCGGAGGCGGTGCGGACCTGTCCAGAAGCGA<br>GTCTCTAAACCTGACCAACAGATTGTTTATCAACAACGGGTCTTTCAGACGTGACGAACGGTGCGCCGA<br>TGAATAACAACAACAGTAATACCGCAACCCCAATTATCGGCAGCGGGATCGGCCGGGCAATGGACCGTCA<br>CCTTCTCCATCGCGGAGAGGATTGCGAGGACGACGAGGAAAGACGAGGATGCCATGAAGTGCAGCGAG<br>AGCGGTTCCGACGTCGCGGCTCGGATCGGGATTGTTGTGACAAGGACGGGAAGAGCGTCAACGGCGACA<br>ACACCAGCAGCATCGACGAGAGCGAACCAGCGCAACGGCAACGACGAGAATGTCAGCACAAACGGCCG<br>GCCACGCACCACTATCAAAGCAAACAACCTCGAATTACTCAAAAACGCCTTCGCACAGACGCCAAACC<br>CACCGCCATATCCGCGACAGTTGTGCGAGGAAACCGGTCTCACTATGCGAGTCAATCAGGTTTGGTTTC<br>AAAATCGCCGAAGCAAAGAACCGCGGATGAAACAGCAGAATCATGGGGCCAGGTCGGCGATGCAATA<br>TGTTTCGATCGCGTCTCGGGAGGACGATCGCTGCGGGAGTTTCGACGGTATTCCGGTGATATGGGAGTT<br>CAGGGTCCACCCGATTTCGTTATTTCCAGATGGTCCCGGCAATCACGGCATGGACTTCTTCCCGGACA<br>GGTTTCTCCCAACGGCGGCCACATGCGGGGCACTCGGACATCTCCGGGTATTTTGAATTCGCCCACTA<br>TCGACCGCCGAGAACGCGGGGGAAGCAGCCGCAATGACAGGCGCATTTCAACGAAATGTCCCCAACGCT<br>CACGGCATGCCCGGAAACATCAATCACCCGGCATGGATGGCCACTTTCGGCAGGAGATGCTGTACAGA<br>GTTCAACTCCAGAACGACGCTAAACTCCTTGACACCGGACGGCTACGGGCATCTGCTTTGACACTTTA<br>CCCCTCATCCCGGCGCAACGGCGGTATCGGGCCGGTCTCGCGGGATGAACGGCAGCAACTACCCGCT<br>CTGGCAGAGCATGACGATGGCCCAATAG |
| <i>apterous</i>   | ATGCCGATTCTGGAGCGGTCTAACAGCGGTCTAATGAGCAGGAGGAAGCCATCAATTCATGTTACCGC<br>ACACGGGGAAGAGCCATCGTGTCTGACGTTGACCACGACCAGCAGCAGGACTATTACCCGGAACGAG<br>GACGTGGCCATCCCAACACCATGTCCAACACCCTGCTGCGGGATACTTCCCGCGTAATCTGCTCCGG<br>CTGTCCGAAATGGGATATCCGAGCAGTACTTCTATCTGTTTCCAATTCGCAAGACTTTTATCACTGCCACTG<br>TCTAAAGTGCAGTGTGTTAGTGTAACTTAGACCCGAAATGATCTGCTATTACAAGGACGGGATGATTC<br>TTTGTAAAGAGGACTATTACAAGTACAAGAGTCAAGGCTGAGCCCCGAAGGTTATCAAAAATAGCCGCTG<br>CCACGGCTGCAACTACCCGATCCGAGCGGACGAGTTTGTGATGCGCGTACGGGAGTTTGTCTCCAGTCC<br>CGTGTTCGCTGCCTGGCCTGCACCGGACACTCCACACGGGGGATGAGTTTACGATGCGTGACGACGGC<br>GCCATCCTCTGTCAACGTCATTCCATCCCGCTGACCGCTGCTCACGTCGGCGGCGGGCGGGCGGCGG<br>TGTCGGATCCTCGTCAAACCCGCAAGTGACACTCTATCTCGACAGCAGCACTACTGCCCCACACAGCA<br>GCCATGACTCCTTCTCGGCCCTCTCCGACATCCCAACCACCACCGCCACCGCCGATCCCTCCGTCTG                                                                                                                                                                                                                                                                                                                                                                                                                                                                                                                                                                                                                                                                                                                                                                                                                                                                                                                                                                                                                     |

---

CCATCCTCATGGCCGATCATGGCCGCCCCGGTCTCGCCGCACTTTGCCCAACTTCAGAACCAGCATCGTCCCGC  
GACATGACGACGGTGGTGACGGGAACGACGGTCGGAAAAGACCTTTTCCACCATCACCACCACAGACATC  
AGCATCATCCTCCGCGTCTCGCGTATGAAAAGCCGGATTTCGACGGACCAAGCGAAACTTGATTTCCCTTCG  
ACGACGGGAGTGGCCGTGTAATTAACCAGCGCCACTGCGGGTGGGTTGAATGGAAGCGGTGGGGAGTT  
ACACGGTGATCCGGTGGGGCAGGCGGAGTGTTCAGCAGCGGCAAGCAGCAGCCGCGATGCAACTGGAG  
CAGCAGTGTACCACACTTCTCCAGTGCCGCTCGCCGAACGCGGCTTCCGGTGCAAACTGCGCAGCA  
GTCGTCTTTTACATCTAGCTCAGAGGAATCGTCCCCGTCGCGATTAGCCAGTTCAGTCCCGGCTTGCAGAT  
GGCGCACCTCACGACTCCATCACGGACTCATCTCACCGAACAACCAACAACACCAGCGCACCAAGCGC  
ATGAGAACCAGCTTCAAGCACAACAACCTTCGCTCCATGAAACAGTACTTCGGTATCAATCACAATCCTGA  
CGAAAGGACCTCAAGCAGCTGCACAGAAGACGGGCTGACGAAGAGAGTCTTCAGGTATGGTTCAG  
AATGCCCGTGCAAAAATATCGCCGTAGTCTCCCAAGCAGGACCCCAATCGGGTGTGGAAGCTAGCCCGAT  
CGCCAAAGCCAGTCCAATCCCCATCACACGACCGGATTACGGTTTGCCGGACAATGCTTCAGCAAAGC  
AACACGACCTTAATCATTACCCAATGTGCAACGGAAGCAATTCTCAAGACAATGGCGCTGAGTACTACTAA

---

*BarH1* ATGGATAGGGATAACGGGGAGAGGAGCAGTAGCAAGTCGCGGTTGGATATGACTGCGCATCCTGCGCATC  
CGCAGCCGTTGACCAGTCCAGTATCACCAGCCATGTAAGGTCACGTGCGAGTAACTGCGCACCCGAGAA  
CCTGTCCATGCGACACTCCTTCCATCAAGGACATCCTCAGTCAGGTCAATCCGAGGCAGCAGGAGAGCA  
GTCGAGTGGAGCAGGAGACGGAATGGGTGCTGGCACATTTCCGCCCGGGAGTCAGGAGGATGGAGACAG  
CGACGTCCAGAGTGAACCTTCCGATACAGAAAGCAAGATGACCACGACGGGGCGGATTAACCCGCGACC  
AGCCGCAATAGTCCGAAAGGCAAGAAATCCCGAAAGCCAGGACAGCGTTTACGGACAGCCAGTTACAGA  
CGCTGGAGAAAACGCTTCGAGCGACAGAAATATCTCAGCGTACAGGACCGGATGGAATTAGCGGCCAGTT  
GAGCCTGTCCGACGCGCAAGTAAATGCTGGTTCCAAAATCGCCGAACCAATGGAAGCGTCAGACGTCG  
GTGACGATCGAGTTGTGGCCGAAAGCGACGGGCAATTACGCGCCATGACGCGGATGTGCACTACTGGT  
CGTGGCGGGTCCGGCAGCCATGCTGGCCGACCAAGCCGCGCTATCCCGCGCAGAACCAGCTCTTTACAG  
ATGCAGGAGTGTACTACCGAAGTCTCCAGCAGCAGCAGCAGCAGCAGCAGGTTGGTGGACGAGTGG  
TCGGCGGACAGGCGGCATACCGCAGATGCCGATGAATCCGGTGACGACGCGATTCTGGCCGACTCCGGC  
CAACATGACCTTCCCCACGGGCAATTCCCGCCCAATGTTATCTCATCGCATCATCAACAGCGGTCCGCA  
CTCCCGTGTCCGGTAGTCCGCGTACGGTCCACCGGATTAACAGCGCAGCTCAATCAGACGATGGC  
ACCGATTAA

---

*rotund* ATGGCTGGAGCCATGAGACCGCGGATGAGCTGAATCTAATGCAGCAGCAGCACCCGCAACGATTCACTC  
CCTGGAACAAAACGCCATGGACTTCCAGAAGATTTGAACAGCAAGCGGCGGCCAACAGCCTCAATGG  
TCATGCCATTCTTCCAAGGCAAGGGCCAACTTCGACATGGTCTCAATGGAGATGGACGAGACGGGA  
GGAGGAGGAGTAGGAGCCGTGAGTGACCTTATGGAGTACAACAGGCAACAAGAGCCATACAATCGGTGA  
TGTAACCTCCTCATCATCACTCGAGCATCATGTCTGGTTCATGCACCAACATCATGCTGGTGGACATA  
ACTTGCCAAAAACCTCAGCGGACGCAAAATCCCATGCAAAAATGTGCAATCAGGTGTTGGAGTCAAAGGC  
CGAGTCCAGATGCACAATCAGTCCGACATGCGCGAACCCAAAGCCCTACCGATGCTCGCAGTGTCCAAAT  
CCTTTGCCAATCTCTCTATCTCTCCAGCATATGCGCATTCATCTCGGCATTAAGCCCTACCAGTGTGACA  
TCTGCAAGAAAAAGTTCACCAACTCTCCATCTGCAGCAGCAGCAGCAGCAGCAGCAGCAGCAGCAGCAGC  
TACCGTTGCCCTCAACCGACTTGCACAAAAGGCCTTCCAGTTGAGCAACCTGCAGAGTCACTTCTCGGTG  
CATCAACAGGACAAGCCCTTCAAATGCCAATCCTGTTACAAGTGTTTTACGACGAACAATCTCTGCTGGA  
TCACATTCCAAGCATAAGGACAGCAAGCATCTCAAGACTCAGTCTGTACCTGCTGCGGCAAGTCCATA  
CCCAGGAGACTTACCTACTGCGACACATGGCCAAAGCACAACGCAAAAACGAAAAGCAGCAGCGGATGTC  
TCTCAACCATATTAACACTGCCACAGTGGACCCGATTGGCCTAAGCAAGAAATGGAAGGTGCCACCCTGA  
TGAGCCAGGAGGATCTGTTATGTACAGCGGTGGCTATTACAGCGCCGCCAACTACGGTAAACGCCACCAC  
GCTGTTATCCTTACGGCGCGGGGACAGCATCTCCGTTAACTATGACACCAGTAATAAGAACTCGGGATC  
AGCCTTCTCATTCTTTCGGGAAGCAGCGGTGCGAACGTGATGGTCTATCCTCATGGCATAAATACTACTC  
ACTCGGCATTTGGATCTGGAGCGATGAAGAGTCAAGATGTCTTTCTGACTCGATGGCCACTTCCAAGA  
GGTCAATTTCCGGTGGATCACTTTGCCGTTTACCAATCATCAGATGCCCGCTATGCGTAATCACTTTTCC  
GCAGGATTCGTGCGCAATAATGGAATGCCGACCATGCTGATGGGAGGAGGAGGAGACGGCAGTACCGCTT  
CCGGTATGCGCAAGGAGCACAGCAACCATAACAGCAGCAGCAAGCCGGGAGGACGCTACTGA

---

*spineless* ATGTATGCCACCAACGACGCGCCGTTCCCTGAAAGGAAGCAGCAGCAAAATTTGCCTATCTAAAAGTG  
CGTACGACACCAGCCACCGGGAACAGCGGCGGGGTTGCGGTGGCGGAAACTCTTCTTCCCTCAAAG  
CAACCTAGCAAGCGTCACCGTGAACGGTTGAATTCGAACTAGAACGGATCGCCAGTTTGCTTCCATTTG  
AAGCGAATATCCTTTCCAAACTGGACAAGCTCTCCATACTGCGTCTTAGCGTTAGTTACCTCCGAATCAA  
AGTTATTTTCATGCCATTCAATTACGAGAGCAGACATACGGCGGATACGACGGTCCCGGTGGACATAAAAC  
GAGTGGCGATCATTTCCAGCCGATCCATCACTGACACGACCGGATTCAGTTCCTAAGGCATTGAATGGAT  
TTGTCTGGTGTGACCGTTCAAGGCGAAGTCTTTTTGCTTCAAGCAACATCGAGGAGTTTTAGGCTTCC  
ATCAGTCGGATGTTATTCATCAGAGCGTTTACGAGCTGATCACTCAGAGGACCGGGTTCGAGCTGCAAG  
CAGCTCTTGGTGGGAGCCCTTCCGCGCTGCGGCGCATATCCCGGCTCGAGGATGAATCCGCACGA  
CGCCTTTTCGCGACAATTTCAACATTTGGAGCGCAGTCTGACGGCCCGGTTTCGTTGCTGCTTGATAA  
CACTTCCGGTTTTCTGCGACTGGAATTCGCGGCCGATCGGAGTTTTCACGGGCAGAACTTCCACTCGG  
CCGGGAGGGCGCCCGGGTCTGTTGCAATCTGCACGCCCTTCGGACCGGCCACTGCGGACAACCTG  
CCAAAGGAGTCCGTCTTCAAAGTAACTCAAGCTCGACCTGACTATCATCAACATCGACACCAAAAGGCA  
AGGATTTGTTGGGATGGGGTGGGGAAGAAAGTGGTTGTCGCTCCTTCAACGCCCCCTTCCAGACGAC  
GTTCTTACGACGCCAGTGCACACCGTGAAGTGAAGACAATTCGTGTGTCATGTACGCTCATCGTAT  
GGCGCGAAGGTCTCCCGGGGACGGCGTACAATGGCAATGGTCCAGACGACCATGAAAATCATTTCCG  
AAAAACGAAAACCTGACCATGTCTCCGCTGCTACCGTCCGTTGAGCGACGAAGAAGGGAAAGATCTGA  
TGACAAAAGCGTGCCTCATCAACAAATATGCGACCTGGACTCTGACGCATCACTGGCCCTGGCCAACAGC  
GCCGTATCGGAACGAGTCCGGTACGGAGTGAAGACAGCCTCTCCTGCACAGTAACTCCCAAAAAG  
CCCCAAACCGCCAAAAGCGACCTTACCAGCGGCAATCACCGAGACCCACGTCATCTCTCTCTCA  
ACCAGTAACAACATCAATAATACTTCTACTACTCCGCCAACCATCCTCTTATCCAGCGGTTCCAGCTCC

---

---

ACCCGTCGACGGAAATCTTTCTCCACGGAGAATGTCATCACCGCCAGAAATGGACACGGCGAGATTGCGG  
CGTACTCTTACCCTACCACACGGAGAGTTCCCTCAACTACTGCGCTCAGAATACCTACCCGACTGCCATT  
TTCTTCCAACGGCCGTGGAACAGTGTTCGCTGATTCCCTACTCCGGACAGTATCATCACGGTACATCGGCC  
GGATTTACTCGACGGGAGCTTTGCCTGTCTCGGATTCGGTCTTTCAGTCGCCTCGCACGGGGTCAATGGA  
TCGACTTTGTAGACCGATCATACTGACTGTACGCAGCGGCTGCATATGGCTCCGCGGCTGACGGTCTACC  
CTCTCAAGGGGATTACCTGAAGAATAATTACAAAGGCATGGACACCTACCCGAGCAATGTCTACAACACG  
GATCACTCCTCCAGCCATCACCATTATCAGCGACCAAGGCCGCGCTGCAGCAAACGGTTGGATGGCATC  
TTCCACCACAGGCAAAGCGTGCTTGTGTGGAACAACGGTAACTCCCGGCCAGACATGAGTCTAGGCTTCA  
CTCCTTCCACGCGAACTACCTCAGGAGTGTATTCCAAGGAGCGCCACCTGTGTCGGCTTTCTCAACCACA  
GCTGACTCTTCTCCCGCCACGAAATAATCAAGTTATGTCCGCACAACGTTCCGACGAGCTGAAAAACA  
TAAGGTCACCAACGGAGATGACTCTTCAGGAGCTTCAGGCATCGGCCTAATCAAGACTGCTGCCCGTTAC  
ATCAAAGCCATAACTTCTCCATCTGTGAGGCGACCAATACCATGCTCGAATCTGCTGGATAA

---

**Table S3.** Amino acid sequences of *Hypsibius exemplaris* distal limb patterning gene homologs

| Gene             | Amino Acid Sequence                                                                                                                                                                                                                                                                                                                                                                                                                                                                                                                                                                                                                                                                                                                                                                                                        |
|------------------|----------------------------------------------------------------------------------------------------------------------------------------------------------------------------------------------------------------------------------------------------------------------------------------------------------------------------------------------------------------------------------------------------------------------------------------------------------------------------------------------------------------------------------------------------------------------------------------------------------------------------------------------------------------------------------------------------------------------------------------------------------------------------------------------------------------------------|
| <i>aristales</i> | MVGHDERPKKENDCVVPERISPSIASAGSLDDKESFVDDSEDSASFAGAGGAGARSGAGLSSKQRRYRTTFTAFQ<br>LQELEKCFGKTHYPDIFTRDELAMRIHLTEARIQVWFQNRRAKWRKTEKSSAPHPISGVEPSPAVQSFNTTHPIPNS<br>NCSFSKGHTDPFLQSPHGPSSADYNVRMNPWGWLIPPSNKYSRSSLTQNFYPEQAAAAAAAAAAMAATTNMWNQR<br>WLQQMAVNSLLHRDVPSPSWTTQTSAGSAVSPAHLTFHPEFRPFPHHPNGTTTAGQLTGPSATAAQWTGPGVT<br>ADAMQKYGAFRSIARNDDGGGGGR                                                                                                                                                                                                                                                                                                                                                                                                                                                                       |
| <i>clawless</i>  | MMENPPARSVFKAPSSRSPVAEKPLKRTPFIDSILSTDTSPKKECFSPSLSEKCSNNENIHTAMDAYAAAAA<br>AATTAMYSSSGYSSPADAYNYGSMVNSHVVKVPAQRVQQQQQHLAPCGGVSPHPALFGIGHVGM SAYQ<br>WMDPARRLLTRRIGHPYQNRTPPKRKKPRTSFTRIQICELEKRFHRQKYLASAERASLAKSLKMTDAQVKTWFQ<br>RRTKHRRQTNEEREADRQAANRMLLSQLAEVTKTSGAYDSTDALCLNNAHLALHNLRPWVNAGDGGGSLSN<br>NHHPHITCPQTNSSSPNNNTNNNCSSRCSSESSEESHEEDRDDDDNRSEVSSDEDALSV                                                                                                                                                                                                                                                                                                                                                                                                                                                  |
| <i>Lim1</i>      | MPVHRHYLQQHPQPPPPSSSGPEDFESHNNRRIVSGKMQNPGGMYDKCHGCGMVILDPFIMAIAIPTASQVWH<br>ADCLRCCECKPLQERCFNGGRFFCREDYFRAFGQPKGCGVGDPTLVRQTQRGNFHLKCFICTACRKLSTG<br>EECYNIGDCEFNCKDDYVTSKHAKAASSTLQSFCKAEQSSPGAATSPCLLGGGGRDLRSSELKPDQHDCLSTG<br>PSDVTNGAPMNNNSNTATPIIGSGIGRAMDGHLLHRGEDCEDDEEDEDAMKCESGSHVPASDRDCCDKDGK<br>SVNGDNTSSIDSEPRNGDENVSTKRRGPRRTTIKAKQLELLKNAFAQTPKPTRHIRDQLSQETGLTMRVIQVWFQ<br>NRRSKERRMKQQNIMGPGRRCNMFRRSRRSGRSLREFDGDSDGMGVQGGPFAYFPDGPNGHGMDFPQGVSPH<br>GGPHAGPLGHPGIFFAHYRPPQNAEAAAAMQAHFNEMSPNAHGMPGNINHPGMDGHRQEMLSQSSTPERTL<br>NSLTPDGYGHPAFDTLPLHPGGGGIGPVPGMNGSNSPVWQSMTMAQ                                                                                                                                                                                                                        |
| <i>apterous</i>  | MPILERSNSGHNEQEEAINSHVTAHGEPSCLQLDHDHGLLPGNEDVAHPQHVVQHPAAGYFPALICSGCRNGI<br>SEQYFLSVNSQDFYHCHCLKCSVCSVTLDRQMICYKDGMLCKEDYKYSRRLSPEGYQNSRCHGCNYPYRA<br>DEFVMRVREFVHFVPCFRCLACTATLHTGDEFTRDDGAILCQRHFHFAAAVAHVGGGGGGVSSSNPASDTL<br>SSTAALLPHSSHDSFSAASSDIPTTTATAASRLPILMADHGAPVSPHFAQLQNRIVPRHDDGGDNDGRKDLFHH<br>HHHQTSASSASSRMRKSRIRRTKRNLISFDDGGGVINQRHTAGGLNGSGGELHGDVPVQGAELLQQRQAAAAMQL<br>EQQCYHHFSSAASPNAALPVQTAQSSFTSSEESSRSLASSPGLQMAHLTHSITDSSPNQHQRTKRMRTSF<br>KHQQLRSMKQYFGINHNPDAKDLKLAQKTGLTKRVLQVWFQNAKAYRRSLKQDPNRVLEASPIAKAQNSNP<br>SPRPDYGLPDNASAKQHDNLNHYPMNSNGSNSQDNGAEYY                                                                                                                                                                                                                               |
| <i>BarH1</i>     | MDRDNGERSSSKSPLDMTAHPAHPQLTSPSITSHVKVTSNCPQNLMSRHSFLIKDILSQVNPRQEQSSRSGAGD<br>GMGAGTFPPGQEDGSDVQSELSDTESKDDHDGADSTATSRNSPKGKSRKARTAFDTSQLQTLERFERQKYL<br>SVQDRMELAAASLSLSDAQVKCWFQNRRTKWKQRQTSVTIELLAETGNYAAMQRMQLQYWSCGGAAMLAAPAA<br>AYPAQQLFQMOELYRSLQQQQQQQVGGRVVGGPGGIPQMPMPNPTTRFWPTANMTFTGNSAPNVHLI<br>ASSTAVATPAAPASPPSRSTGIKTAQSDDGTD                                                                                                                                                                                                                                                                                                                                                                                                                                                                              |
| <i>rotund</i>    | MAGAHETADELNLMOQHPQRFPTWVNQAMDFQKILNQAAANSLNGHAHSLQGGKPNFDMVSMEMDETGG<br>GGVGAVSDLYGVQQAATRAIQSVMVTPHHHSSIMSGFMHQHHAGGHNLPKTLGRKFPCKMCNQVLESKAEFQ<br>MHNQSHMREPYPYRCSQCPKSFANSSYLSQHMRHLGKPYHCDICKKFTQLSHLQQHIRTHTGDKPYRCPQPTC<br>TKAFSLSNLQSHSRCHQDQKPKCQSCYKCFYDEQSLDHPKHKDSKHLKTHICTCCGKSYTQETYLRLHMAK<br>HNDKNEKQQRMSLNHIKTATVDPYWPQEMEGAHMSQEDLFMYSGGYSAANYGNAHHAHVHPYAGQTSVP<br>NYDTSNKNSGSAFSLSGSSGRNVMAHPHAHNYDFAFGSGAMKSNVLSDSMATSKNGPISVDHFAFTNHQM<br>PAMRNHFSAGFVGNMGPTMLMGGGGDGTASGMRKEHSNHNSSKPGGGRY                                                                                                                                                                                                                                                                                                          |
| <i>spineless</i> | MYATKRRRSLKGSSSKICLSKSAYDTHHGNSGGGCGGSSSLKSNPSKRHRERLNSELERIASLLPFEANILSK<br>LDKLSILRLSVSYLRIKSYFHAQLREQTYGGYDGGPGGKTSADHFDADPSLTRTDSVLKALNGFVLLVTVQGEVF<br>FASSNIEEFLGFHQSDVIHQSVYELIHSEDRVELQQLSWLGSPSAAAHHPGSRMNPDAFSSDNFQHLERSLTAR<br>FRCLLDNTSGFLRLRIGRIGVHLHGQNFHSAGEAPPGLLAICTPFGPATLPDNLPKESVFKSKLKLDTIINIDTKGKD<br>LLGWGGEESGCRSFYNALHPDDVLYAASAHRELSKTNSCVMYAHMARKVVPGTALQWQVQTTMKIIPKNG<br>KPDHVSAAHRPLSDEEGKDLMTKRASITKCLDLDSDASLALANSAVSEASAGHGVEDSLCTVTPKAPKPPKRP<br>SPAANHRDPTSSSSSTNNINNTSHYSAQPSLSSGSSSTRRRKSFSTENVITARNHGIEAAYSSPYHTESSLNYCAQ<br>NTYPTAIFLPTAVEQCSLIPYSGQYHHGTSAGFYSTGALPVSDSVLSVASHGVNGSTLLDRSYDLYAAAAYGSAAD<br>GLPSQGDYLNYYKGMPTYPSNVYNTDSSSHHSSATKAAAANGWMASSSHRQSVLVWNNNGNSRPMDSLG<br>FTPSTRTSGVYSQGAPPVSAFSTTADSSSRHANNQVMSAQRSHDAENNKVTNGDSSGASGIGLIKTAAPLHQSH<br>NFSICEATNTMLESAG |

**Table S4.** Blastp result against the Flybase database using *Hypsibius exemplaris* distal limb patterning gene homologs as query

| Gene             | BLAST Hit Summary |         |         |             |
|------------------|-------------------|---------|---------|-------------|
| <i>aristales</i> | BLAST Hit Summary |         |         |             |
|                  | Description       | Species | Score   | E value     |
|                  | al-PA             | Dmel    | 122.094 | 6.02387e-28 |
|                  | Pph13-PA          | Dmel    | 114.39  | 1.225e-25   |
|                  | hbn-PA            | Dmel    | 111.309 | 1.34315e-24 |
|                  | Drgx-PF           | Dmel    | 109.383 | 4.35569e-24 |
|                  | Drgx-PE           | Dmel    | 109.383 | 4.35569e-24 |
|                  | Rx-PB             | Dmel    | 109.383 | 4.39219e-24 |
|                  | PHDP-PA           | Dmel    | 106.686 | 3.17311e-23 |
|                  | prd-PA            | Dmel    | 99.7525 | 3.3102e-21  |
|                  | prd-PB            | Dmel    | 99.7525 | 3.45122e-21 |
|                  | CG9876-PA         | Dmel    | 98.2117 | 1.12858e-20 |
|                  | CG32532-PD        | Dmel    | 95.5153 | 6.9002e-20  |
|                  | CG34367-PC        | Dmel    | 94.7449 | 1.08278e-19 |
|                  | CG34367-PB        | Dmel    | 94.3597 | 1.36773e-19 |
|                  | CG32532-PB        | Dmel    | 94.3597 | 1.39075e-19 |
|                  | CG32532-PC        | Dmel    | 94.3597 | 1.44999e-19 |
|                  | CG11294-PB        | Dmel    | 94.3597 | 1.68497e-19 |
|                  | CG11294-PA        | Dmel    | 94.3597 | 1.68497e-19 |
|                  | otp-PK            | Dmel    | 93.2041 | 3.25731e-19 |
|                  | otp-PJ            | Dmel    | 93.2041 | 3.69159e-19 |
|                  | otp-PF            | Dmel    | 92.8189 | 4.43541e-19 |
|                  | otp-PC            | Dmel    | 92.8189 | 4.66311e-19 |
|                  | Ptx1-PE           | Dmel    | 92.0485 | 6.73157e-19 |
|                  | Ptx1-PA           | Dmel    | 92.0485 | 7.50281e-19 |
|                  | ey-PB             | Dmel    | 92.0485 | 8.29292e-19 |
|                  | Ptx1-PC           | Dmel    | 92.0485 | 8.43247e-19 |
| <i>clawless</i>  | BLAST Hit Summary |         |         |             |
|                  | Description       | Species | Score   | E value     |
|                  | C15-PA            | Dmel    | 199.904 | 2.63135e-51 |
|                  | B-H1-PA           | Dmel    | 81.6481 | 1.06197e-15 |
|                  | Hmx-PE            | Dmel    | 80.8777 | 2.15834e-15 |
|                  | Hmx-PC            | Dmel    | 80.8777 | 2.15834e-15 |
|                  | Hmx-PD            | Dmel    | 80.4925 | 2.72636e-15 |
|                  | lbe-PA            | Dmel    | 80.1073 | 2.9636e-15  |
|                  | NK7.1-PD          | Dmel    | 78.5666 | 8.84131e-15 |
|                  | NK7.1-PC          | Dmel    | 78.5666 | 8.84131e-15 |
|                  | NK7.1-PB          | Dmel    | 78.5666 | 8.84131e-15 |
|                  | NK7.1-PA          | Dmel    | 78.5666 | 8.84131e-15 |
|                  | B-H2-PA           | Dmel    | 78.5666 | 9.21796e-15 |
|                  | bap-PA            | Dmel    | 78.5666 | 9.2952e-15  |
|                  | lms-PC            | Dmel    | 78.5666 | 1.03601e-14 |
|                  | lms-PB            | Dmel    | 78.5666 | 1.03601e-14 |
|                  | Dr-PA             | Dmel    | 78.1814 | 1.11681e-14 |
|                  | bsh-PC            | Dmel    | 78.1814 | 1.26571e-14 |
|                  | bsh-PB            | Dmel    | 78.1814 | 1.26571e-14 |
|                  | lbi-PA            | Dmel    | 77.411  | 2.17706e-14 |
|                  | B-H2-PB           | Dmel    | 77.411  | 2.42649e-14 |
|                  | pb-PD             | Dmel    | 76.2554 | 4.76972e-14 |
|                  | pb-PC             | Dmel    | 76.2554 | 5.0566e-14  |
|                  | pb-PB             | Dmel    | 76.2554 | 5.0566e-14  |
|                  | pb-PA             | Dmel    | 76.2554 | 5.0566e-14  |
|                  | Dll-PC            | Dmel    | 74.7146 | 1.23478e-13 |
|                  | Dll-PB            | Dmel    | 74.7146 | 1.24512e-13 |



*Lim1*

| BLAST Hit Summary |         |         |             |                                     |
|-------------------|---------|---------|-------------|-------------------------------------|
| Description       | Species | Score   | E value     |                                     |
| Lim1-PA           | Dmel    | 251.136 | 2.15928e-66 | <input checked="" type="checkbox"/> |
| Lim1-PB           | Dmel    | 138.272 | 1.87657e-32 | <input checked="" type="checkbox"/> |
| Lim3-PG           | Dmel    | 128.257 | 1.89394e-29 | <input checked="" type="checkbox"/> |
| Lim3-PF           | Dmel    | 127.872 | 2.43263e-29 | <input checked="" type="checkbox"/> |
| Lim3-PD           | Dmel    | 127.872 | 2.43263e-29 | <input checked="" type="checkbox"/> |
| Lim3-PC           | Dmel    | 127.872 | 2.43263e-29 | <input checked="" type="checkbox"/> |
| Lim3-PB           | Dmel    | 127.872 | 2.43263e-29 | <input checked="" type="checkbox"/> |
| Lim3-PE           | Dmel    | 126.716 | 5.69754e-29 | <input checked="" type="checkbox"/> |
| Lim3-PA           | Dmel    | 126.331 | 6.84554e-29 | <input checked="" type="checkbox"/> |
| Awh-PC            | Dmel    | 96.6709 | 7.09635e-20 | <input checked="" type="checkbox"/> |
| Awh-PB            | Dmel    | 95.9005 | 1.0159e-19  | <input checked="" type="checkbox"/> |
| Awh-PD            | Dmel    | 95.5153 | 1.25154e-19 | <input checked="" type="checkbox"/> |
| Awh-PA            | Dmel    | 92.8189 | 8.45781e-19 | <input checked="" type="checkbox"/> |
| ap-PA             | Dmel    | 92.8189 | 8.892e-19   | <input checked="" type="checkbox"/> |
| ap-PC             | Dmel    | 92.8189 | 9.04163e-19 | <input checked="" type="checkbox"/> |
| tup-PC            | Dmel    | 90.8929 | 3.43582e-18 | <input checked="" type="checkbox"/> |
| tup-PA            | Dmel    | 90.8929 | 3.43582e-18 | <input checked="" type="checkbox"/> |
| tup-PB            | Dmel    | 90.1225 | 5.57444e-18 | <input checked="" type="checkbox"/> |
| Lmx1a-PC          | Dmel    | 90.1225 | 6.21311e-18 | <input checked="" type="checkbox"/> |
| Lmx1a-PB          | Dmel    | 90.1225 | 6.47779e-18 | <input checked="" type="checkbox"/> |
| CG4328-PB         | Dmel    | 81.6481 | 2.04994e-15 | <input checked="" type="checkbox"/> |
| Bx-PF             | Dmel    | 71.633  | 2.10373e-12 | <input checked="" type="checkbox"/> |
| Bx-PB             | Dmel    | 70.8626 | 3.96632e-12 | <input checked="" type="checkbox"/> |
| Bx-PD             | Dmel    | 70.0922 | 5.82204e-12 | <input checked="" type="checkbox"/> |
| Bx-PC             | Dmel    | 70.0922 | 7.17243e-12 | <input checked="" type="checkbox"/> |

*apterous*

| BLAST Hit Summary |         |         |             |                                     |
|-------------------|---------|---------|-------------|-------------------------------------|
| Description       | Species | Score   | E value     |                                     |
| ap-PA             | Dmel    | 126.331 | 6.97109e-29 | <input checked="" type="checkbox"/> |
| ap-PC             | Dmel    | 126.331 | 7.02949e-29 | <input checked="" type="checkbox"/> |
| ap-PE             | Dmel    | 125.176 | 1.61916e-28 | <input checked="" type="checkbox"/> |
| ap-PB             | Dmel    | 125.176 | 1.61916e-28 | <input checked="" type="checkbox"/> |
| tup-PC            | Dmel    | 100.908 | 3.64471e-21 | <input checked="" type="checkbox"/> |
| tup-PA            | Dmel    | 100.908 | 3.64471e-21 | <input checked="" type="checkbox"/> |
| tup-PB            | Dmel    | 99.7525 | 7.53218e-21 | <input checked="" type="checkbox"/> |
| Awh-PC            | Dmel    | 94.7449 | 2.65593e-19 | <input checked="" type="checkbox"/> |
| Awh-PB            | Dmel    | 93.5893 | 4.60657e-19 | <input checked="" type="checkbox"/> |
| Awh-PD            | Dmel    | 93.2041 | 6.27266e-19 | <input checked="" type="checkbox"/> |
| Awh-PA            | Dmel    | 91.2781 | 2.48515e-18 | <input checked="" type="checkbox"/> |
| Lim3-PF           | Dmel    | 90.5077 | 4.03204e-18 | <input checked="" type="checkbox"/> |
| Lim3-PD           | Dmel    | 90.5077 | 4.03204e-18 | <input checked="" type="checkbox"/> |
| Lim3-PC           | Dmel    | 90.5077 | 4.03204e-18 | <input checked="" type="checkbox"/> |
| Lim3-PB           | Dmel    | 90.5077 | 4.03204e-18 | <input checked="" type="checkbox"/> |
| Lim3-PG           | Dmel    | 90.5077 | 4.53164e-18 | <input checked="" type="checkbox"/> |
| Lim3-PE           | Dmel    | 89.3521 | 8.8338e-18  | <input checked="" type="checkbox"/> |
| Lim3-PA           | Dmel    | 89.3521 | 8.8338e-18  | <input checked="" type="checkbox"/> |
| Lmx1a-PC          | Dmel    | 87.8113 | 2.63539e-17 | <input checked="" type="checkbox"/> |
| Lmx1a-PB          | Dmel    | 87.8113 | 2.67974e-17 | <input checked="" type="checkbox"/> |
| CG4328-PB         | Dmel    | 82.0333 | 1.4582e-15  | <input checked="" type="checkbox"/> |
| Lim1-PA           | Dmel    | 73.559  | 5.9271e-13  | <input checked="" type="checkbox"/> |
| Bx-PF             | Dmel    | 69.707  | 7.24328e-12 | <input checked="" type="checkbox"/> |
| Bx-PD             | Dmel    | 69.3218 | 9.94567e-12 | <input checked="" type="checkbox"/> |
| Bx-PB             | Dmel    | 69.3218 | 1.16542e-11 | <input checked="" type="checkbox"/> |

*BarH1*

| BLAST Hit Summary |         |         |             |                                     |
|-------------------|---------|---------|-------------|-------------------------------------|
| Description       | Species | Score   | E value     |                                     |
| B-H1-PA           | Dmel    | 143.665 | 2.28872e-34 | <input checked="" type="checkbox"/> |
| B-H2-PA           | Dmel    | 139.813 | 3.59249e-33 | <input checked="" type="checkbox"/> |
| B-H2-PB           | Dmel    | 138.272 | 1.02796e-32 | <input checked="" type="checkbox"/> |
| ims-PC            | Dmel    | 91.6633 | 1.09421e-18 | <input checked="" type="checkbox"/> |
| ims-PB            | Dmel    | 91.6633 | 1.09421e-18 | <input checked="" type="checkbox"/> |
| CG11085-PA        | Dmel    | 90.5077 | 2.04586e-18 | <input checked="" type="checkbox"/> |
| NK7.1-PD          | Dmel    | 87.4261 | 1.82084e-17 | <input checked="" type="checkbox"/> |
| NK7.1-PC          | Dmel    | 87.4261 | 1.82084e-17 | <input checked="" type="checkbox"/> |
| NK7.1-PB          | Dmel    | 87.4261 | 1.82084e-17 | <input checked="" type="checkbox"/> |
| NK7.1-PA          | Dmel    | 87.4261 | 1.82084e-17 | <input checked="" type="checkbox"/> |
| lbe-PA            | Dmel    | 87.0409 | 2.43836e-17 | <input checked="" type="checkbox"/> |
| Dil-PB            | Dmel    | 85.8853 | 5.80708e-17 | <input checked="" type="checkbox"/> |
| Dil-PA            | Dmel    | 85.5001 | 6.58131e-17 | <input checked="" type="checkbox"/> |
| Dil-PC            | Dmel    | 85.5001 | 6.74812e-17 | <input checked="" type="checkbox"/> |
| bsh-PC            | Dmel    | 85.5001 | 6.91917e-17 | <input checked="" type="checkbox"/> |
| bsh-PB            | Dmel    | 85.5001 | 6.91917e-17 | <input checked="" type="checkbox"/> |
| slou-PA           | Dmel    | 85.1149 | 9.90537e-17 | <input checked="" type="checkbox"/> |
| slou-PB           | Dmel    | 84.7297 | 1.20009e-16 | <input checked="" type="checkbox"/> |
| C15-PA            | Dmel    | 83.1889 | 3.21222e-16 | <input checked="" type="checkbox"/> |
| exex-PA           | Dmel    | 82.8037 | 4.12585e-16 | <input checked="" type="checkbox"/> |
| toe-PA            | Dmel    | 82.8037 | 4.44761e-16 | <input checked="" type="checkbox"/> |
| Hmx-PE            | Dmel    | 82.0333 | 8.88974e-16 | <input checked="" type="checkbox"/> |
| Hmx-PC            | Dmel    | 82.0333 | 8.88974e-16 | <input checked="" type="checkbox"/> |
| Hmx-PD            | Dmel    | 81.6481 | 1.10434e-15 | <input checked="" type="checkbox"/> |
| lbi-PA            | Dmel    | 80.4925 | 2.50162e-15 | <input checked="" type="checkbox"/> |

rotund

| BLAST Hit Summary                              |         |         |             |  |
|------------------------------------------------|---------|---------|-------------|--|
| Description                                    | Species | Score   | E value     |  |
| <input checked="" type="checkbox"/> rn-PF      | Dmel    | 303.138 | 3.87162e-82 |  |
| <input checked="" type="checkbox"/> rn-PE      | Dmel    | 302.753 | 5.2719e-82  |  |
| <input checked="" type="checkbox"/> rn-PG      | Dmel    | 302.368 | 5.82708e-82 |  |
| <input checked="" type="checkbox"/> rn-PC      | Dmel    | 287.345 | 2.3113e-77  |  |
| <input checked="" type="checkbox"/> sqz-PA     | Dmel    | 263.462 | 2.95001e-70 |  |
| <input checked="" type="checkbox"/> Kr-h1-PA   | Dmel    | 134.806 | 1.73459e-31 |  |
| <input checked="" type="checkbox"/> Kr-h1-PB   | Dmel    | 134.806 | 1.79346e-31 |  |
| <input checked="" type="checkbox"/> dati-PA    | Dmel    | 125.561 | 9.52077e-29 |  |
| <input checked="" type="checkbox"/> dati-PC    | Dmel    | 125.561 | 9.52077e-29 |  |
| <input checked="" type="checkbox"/> dati-PD    | Dmel    | 125.176 | 1.29642e-28 |  |
| <input checked="" type="checkbox"/> dati-PB    | Dmel    | 124.79  | 1.90298e-28 |  |
| <input checked="" type="checkbox"/> gl-PA      | Dmel    | 118.242 | 1.50739e-26 |  |
| <input checked="" type="checkbox"/> gl-PC      | Dmel    | 118.242 | 1.55854e-26 |  |
| <input checked="" type="checkbox"/> crof-PG    | Dmel    | 118.242 | 1.61144e-26 |  |
| <input checked="" type="checkbox"/> Meics-PA   | Dmel    | 117.472 | 3.06361e-26 |  |
| <input checked="" type="checkbox"/> Meics-PB   | Dmel    | 117.087 | 3.47207e-26 |  |
| <input checked="" type="checkbox"/> Clamp-PA   | Dmel    | 115.161 | 1.6119e-25  |  |
| <input checked="" type="checkbox"/> Kr-PB      | Dmel    | 114.775 | 1.98578e-25 |  |
| <input checked="" type="checkbox"/> Kr-PA      | Dmel    | 114.775 | 1.98578e-25 |  |
| <input checked="" type="checkbox"/> CG12299-PA | Dmel    | 114.39  | 2.38589e-25 |  |
| <input checked="" type="checkbox"/> Clamp-PB   | Dmel    | 114.39  | 2.5935e-25  |  |
| <input checked="" type="checkbox"/> CG17385-PB | Dmel    | 114.005 | 3.22182e-25 |  |
| <input checked="" type="checkbox"/> CG17385-PA | Dmel    | 114.005 | 3.22182e-25 |  |
| <input checked="" type="checkbox"/> crof-PD    | Dmel    | 113.62  | 3.90342e-25 |  |
| <input checked="" type="checkbox"/> gl-PB      | Dmel    | 113.62  | 4.06971e-25 |  |

spineless

| BLAST Hit Summary                           |         |         |              |  |
|---------------------------------------------|---------|---------|--------------|--|
| Description                                 | Species | Score   | E value      |  |
| <input checked="" type="checkbox"/> ss-PD   | Dmel    | 371.703 | 1.41622e-102 |  |
| <input checked="" type="checkbox"/> ss-PC   | Dmel    | 371.703 | 1.41622e-102 |  |
| <input checked="" type="checkbox"/> ss-PA   | Dmel    | 370.933 | 2.47694e-102 |  |
| <input checked="" type="checkbox"/> sim-PA  | Dmel    | 105.531 | 2.07501e-22  |  |
| <input checked="" type="checkbox"/> sim-PC  | Dmel    | 105.145 | 2.21824e-22  |  |
| <input checked="" type="checkbox"/> sim-PD  | Dmel    | 105.145 | 2.23683e-22  |  |
| <input checked="" type="checkbox"/> sim-PB  | Dmel    | 105.145 | 2.68753e-22  |  |
| <input checked="" type="checkbox"/> trh-PG  | Dmel    | 89.7373 | 9.80667e-18  |  |
| <input checked="" type="checkbox"/> sima-PD | Dmel    | 88.5817 | 2.53873e-17  |  |
| <input checked="" type="checkbox"/> trh-PC  | Dmel    | 88.5817 | 2.56e-17     |  |
| <input checked="" type="checkbox"/> trh-PB  | Dmel    | 88.1965 | 3.02492e-17  |  |
| <input checked="" type="checkbox"/> sima-PA | Dmel    | 88.1965 | 3.42822e-17  |  |
| <input checked="" type="checkbox"/> dysf-PB | Dmel    | 82.4185 | 1.73054e-15  |  |
| <input checked="" type="checkbox"/> dysf-PC | Dmel    | 82.0333 | 2.39609e-15  |  |
| <input checked="" type="checkbox"/> dysf-PD | Dmel    | 81.6481 | 2.62642e-15  |  |
| <input checked="" type="checkbox"/> sima-PB | Dmel    | 80.1073 | 7.77029e-15  |  |
| <input checked="" type="checkbox"/> Met-PB  | Dmel    | 79.7221 | 1.16949e-14  |  |
| <input checked="" type="checkbox"/> Met-PA  | Dmel    | 79.7221 | 1.16949e-14  |  |
| <input checked="" type="checkbox"/> gce-PE  | Dmel    | 71.2478 | 4.30067e-12  |  |
| <input checked="" type="checkbox"/> gce-PD  | Dmel    | 71.2478 | 4.30067e-12  |  |
| <input checked="" type="checkbox"/> gce-PC  | Dmel    | 71.2478 | 4.30067e-12  |  |
| <input checked="" type="checkbox"/> gce-PG  | Dmel    | 71.2478 | 4.30067e-12  |  |
| <input checked="" type="checkbox"/> trh-PA  | Dmel    | 70.8626 | 5.478e-12    |  |
| <input checked="" type="checkbox"/> trh-PE  | Dmel    | 70.4774 | 6.31283e-12  |  |
| <input checked="" type="checkbox"/> trh-PD  | Dmel    | 70.4774 | 6.36572e-12  |  |

**Table S5.** Protein domains of *Drosophila melanogaster*, *Hypsibius exemplaris*, and *Echiniscoides cf. sigismundi* distal limb patterning genes

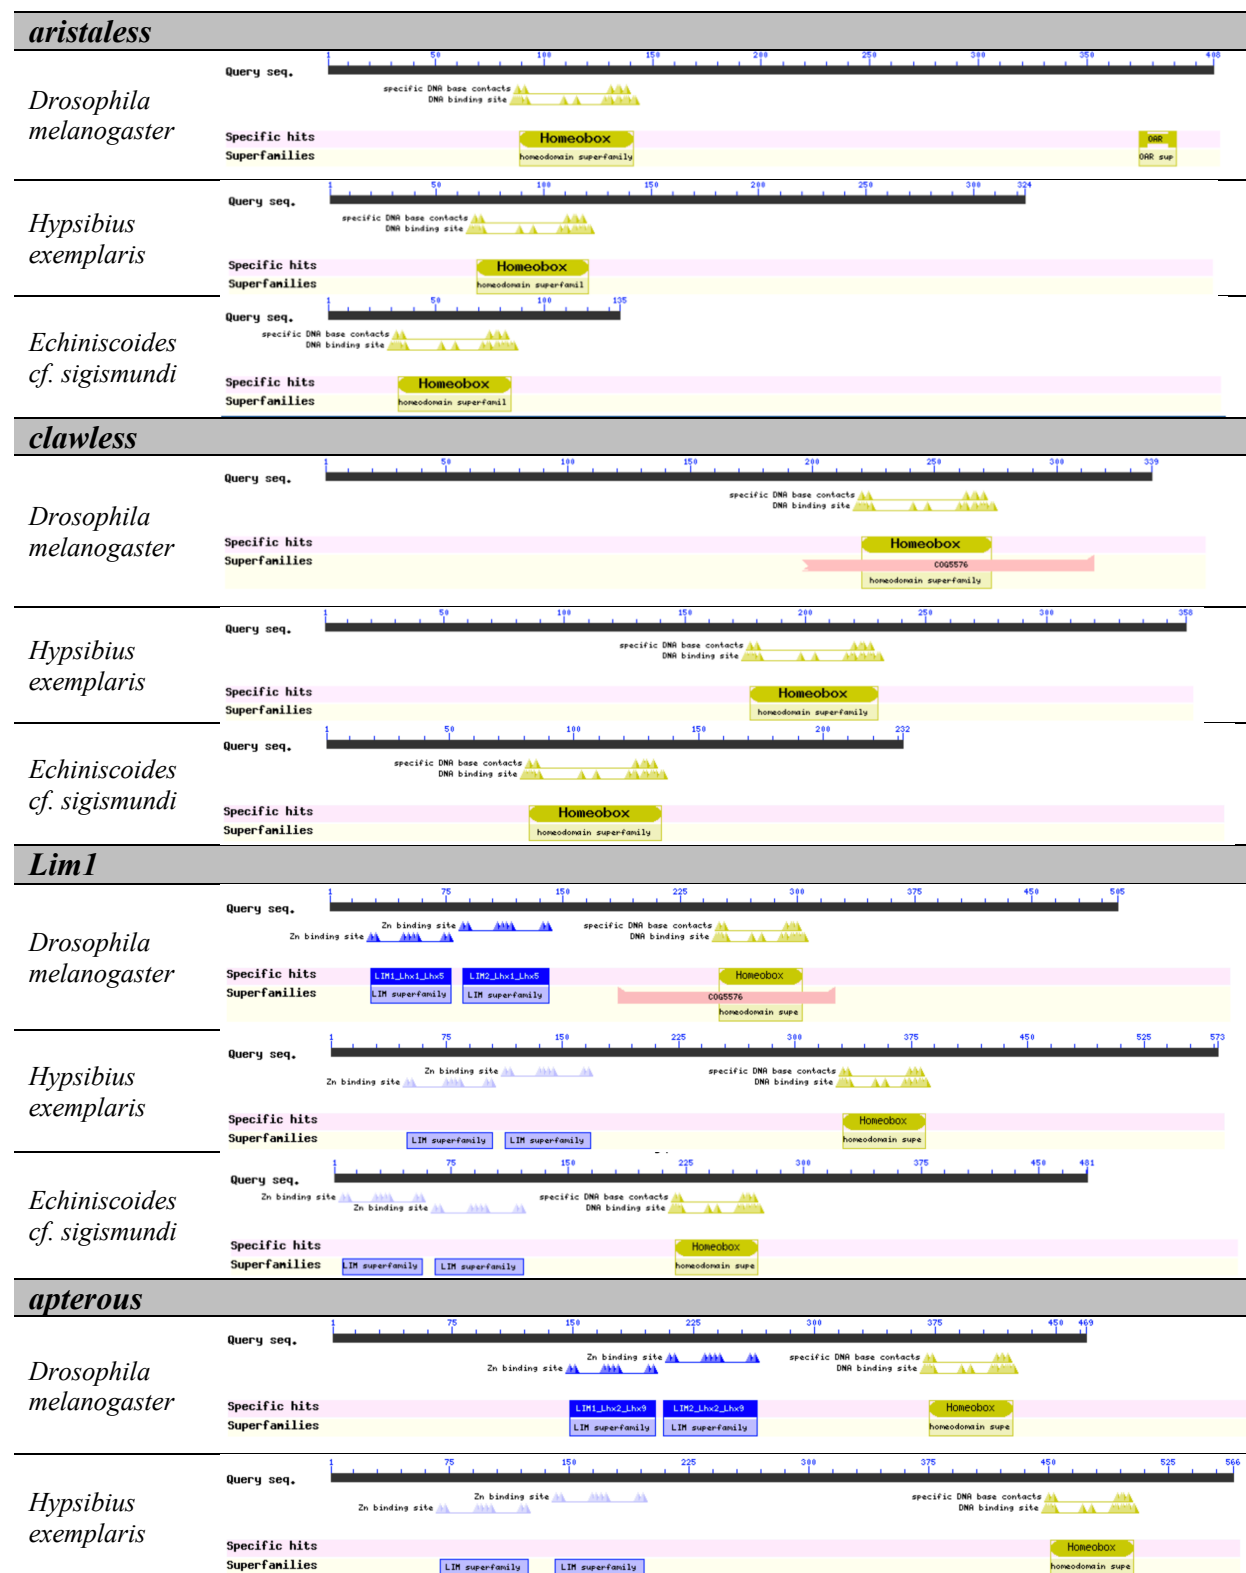

*Echiniscoides cf. sigismundi*

Query seq. 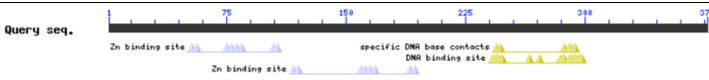

Specific hits 

Superfamilies 

**BarH1**

*Drosophila melanogaster*

Query seq. 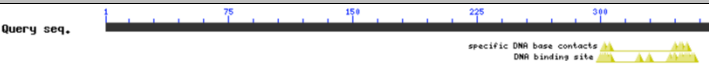

Specific hits 

Superfamilies 

*Hypsibius exemplaris*

Query seq. 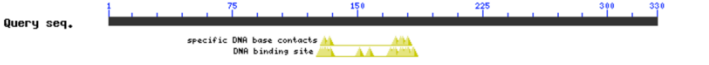

Specific hits 

Superfamilies 

*Echiniscoides cf. sigismundi*

Query seq. 

Specific hits 

Superfamilies 

**rotund**

*Drosophila melanogaster*

Query seq. 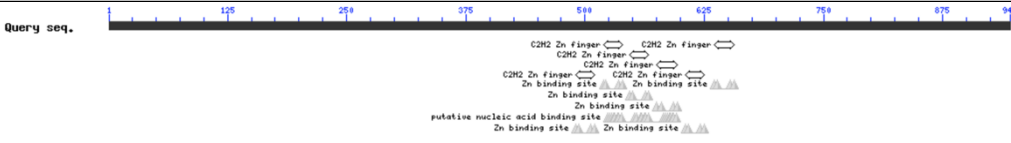

Specific hits 

Superfamilies 

*Hypsibius exemplaris*

Query seq. 

Specific hits 

Superfamilies 

gene 1

*Echiniscoides cf. sigismundi*

Query seq. 

Specific hits 

Superfamilies 

gene 2

Query seq. 

Superfamilies 

**Spineless**

*Drosophila melanogaster*

Query seq. 

Specific hits 

Superfamilies 

*Hypsibius  
exemplaris*

Query seq. 1 125 250 375 500 625 750

DNA binding site

dimer interface

Specific hits

Superfamilies

PHLH2F\_2

PHS

PHS superf

PHS\_11

*Echiniscoides  
cf. sigismundi*

Query seq. 1 125 250 375

Specific hits

Superfamilies

PHS

PHS superf

PHS\_11

**Table S6.** Amino acid sequences of *Echiniscoids cf. sigismundi* distal limb patterning gene homologs

| Gene             | Amino Acid Sequence                                                                                                                                                                                                                                                                                                                                                                                                                                                                                                        |
|------------------|----------------------------------------------------------------------------------------------------------------------------------------------------------------------------------------------------------------------------------------------------------------------------------------------------------------------------------------------------------------------------------------------------------------------------------------------------------------------------------------------------------------------------|
| <i>aristales</i> | MSSITATNNISTASIFGYGNEDKLNQRKQRRYRTTFSSTQLDELERVFGETHYPDVFIREELALRINLTEARVQVWF<br>QNRRAKHRKQDKNELQSIPINPVMNNFALLMQQQQQQQNEMQFHSGLQQQPQQQHQ                                                                                                                                                                                                                                                                                                                                                                                  |
| <i>clawless</i>  | NNNNNNVNEKSTSTSAFTPVIKHQPPQQQQNHHLNQHQHQNALNSVLATHLAWNDPSIRRLGRRIGHPYQQR<br>TPPKRKKPRTSFTRIQICELEKRFQRQKYLASAERATLAKSLKMTDAQVKTWFQNRRTKWRRQTAEEREAEERQAA<br>SRMLLSLQAEALQKAPPMASAPDPICMSNKSLEYALHNLQPWASNMQTTTSSPISSVYNDDKCNSSDIVDDDDDD<br>LDDYDIID                                                                                                                                                                                                                                                                        |
| <i>Lim1</i>      | MQVVKCCACDQLINDKFIMNVLDRTWHAELRCCICSMILTDKCFSRHGKVYCRDHFYKAFGAKCCVCFEGINP<br>DELVRRTVQGGVYHIKCFKNECHKELTTGEQFYCIDESRFLCKSDFLMKQIPLTSSNQVNSWPKSIKSENDE<br>EIEQGSQQQLYNTNNAHSNCTTPNAHQSSSEKEEFDDSDSTNKDNKIKHDNDSTHQPSGTRRRGPRTTIKQKQ<br>LEQLKEIFDSQPKPKAIRDQLASKTGLSKRVIQVWFQNRRSKERRMKTSONLRGRNAYARHRNGGRSSSSGRPEL<br>EQHAQGGPPPHIFGFYTDNGVPPGPPDMFGASPGNFYPPNDPNNFNFLAPPPPPPPDVMNNNGGANGGGN<br>LSAMSQHFPPSSISNESPVPSLVINGIQPNESLNANNNNTNSQQQKQFNGTRDHFLLPSPTSIDGYQASNFQDPCSMQ<br>FSGMRIQQQPPATQISPESAGLIN                  |
| <i>apterous</i>  | ILFPMDLNEEITTTTTATTIAPPLINSSSSVENINTPAITETQSLSTSDICNACFLPIQERYLLMLGDSLLYHSHCLKC<br>LDCGVQLCEDDRSCFFNSGNVYCRQDYQKRFNRQRCNVTQSTDLVMTVPCEDLQNNNSNNTPTLPSSLPI<br>QFHVDCFSACICERVLASGELYRYIPMPHNTLLCEHLEWSNFKDDSGKLSKVGPRPKRKSQDSSHSTCSGGNGG<br>NNEHSMQRPKRMRTSFKHPQIKVMKQFFISNQNPDAKMLKTLSTARTSLSKRVLQVWFQNRRAKFRREHRSKQHQ<br>HQSVMNGPDGYNPHGPDVYQLHIPPTVQSLPSVASYSPGGTTSRNNGNLGGQQQQQQKPSDSYS                                                                                                                                 |
| <i>BarH1</i>     | QTLNKLHYDDSDCEDYCDKTNKTTTTTHNNKQNLHLLSKKARKPRTAFTEHQLDVLEKSFQGGQKYLVSQVE<br>RLELAACLCLTDAQVKCWFQNRRTKWKRTMEAEQFNQALYNYNGHHHLHNNLLIGNTTQQQQQQQ                                                                                                                                                                                                                                                                                                                                                                              |
| <i>rotund</i>    | (gene 1)<br>FDPTAAERLMYRQQQQQQQPVVQPTQHQQHNTASIDDVAQRSLASLEQSVQLSAKSTPRQVATSVRRYN<br>CRMCSKSFETKQEHHQHVQAHMREHKPYKCTQCPKTFANSSYLQHMRIHLGLRYPKCSQCEKNFTQLSHKNQH<br>ERTHSGKKPYLCPQPGCGKYFQSLSNLQSHSRCHQSHKAFKCSCHKCFDDEESLLEHIPKHIESKHLKHKICRYC<br>GKSYAQETYLTKHLKHLPKQSDTDESEKSNLEVTNSKLLKPPATTEKLDSEKSEITNSNNNTTNNMYML<br>(gene 2)<br>TKTFANSSYLSQHMRIHLGVRPYKPCSDKRFQTLSHLQHQHRTSHSGDKPYACKHPNCNKAQSLSNLQSHSRCH<br>QTNKPYKNSCFRSEFEKSLLEHIPRHKESKHLKTHICEHCGKSYAQETYLQKHLNKHHPNLGGCNKRNSNNG<br>RGKCKRIQQQQPPQQLHQQQQQNTIW |
| <i>spineless</i> | YSHHQHHLHQQQQLHNTHYNQFSNYPSTSDNACNRILTAGLGPQLSRESIMKALNGFLVIIQADGEVVFVSN<br>TVEHFLGFHQSDVLHQSDLIHSEDRIQKLEWNSLRQNSQPSYDFALADNPFMLERNFTARFRCLLDNTSGFL<br>RLDVRGRLSLPGQKTRSSSIALFALCSVFGPTQMIESVSRNCLFRSKHKMDLEVINFDKGGKINIDDKNDIEGKEL<br>YNLVHSDDLQYIATGHAELKGTGTLAYRLRFDEQKQWVQSNLRINYSRGRGEFITAIHRVLIDEEGIDLYS<br>KRKISSAFSYLVDFNSTQQQTNNNNNSLTTDSSQSSFRPITN                                                                                                                                                              |

**Table S7.** Blastp result against the Flybase database using *Echiniscoides cf. sigismundi* distal limb patterning gene homologs as query

| Gene             | BLAST Hit Summary |                   |         |             |
|------------------|-------------------|-------------------|---------|-------------|
| <i>aristales</i> | BLAST Hit Summary |                   |         |             |
|                  | Description       | Species           | Score   | E value     |
|                  | al-PA             | Dmel              | 122.865 | 8.19371e-29 |
|                  | Pph13-PA          | Dmel              | 110.923 | 3.16876e-25 |
|                  | Drx-PF            | Dmel              | 103.219 | 7.06335e-23 |
|                  | Drx-PE            | Dmel              | 103.219 | 7.06335e-23 |
|                  | PHDP-PA           | Dmel              | 102.834 | 8.92221e-23 |
|                  | prd-PA            | Dmel              | 100.908 | 3.01665e-22 |
|                  | prd-PB            | Dmel              | 100.908 | 3.27915e-22 |
|                  | Rx-PB             | Dmel              | 98.9821 | 1.22545e-21 |
|                  | oc-PE             | Dmel              | 98.5969 | 1.50969e-21 |
|                  | oc-PD             | Dmel              | 98.2117 | 1.82908e-21 |
|                  | oc-PG             | Dmel              | 98.2117 | 1.82908e-21 |
|                  | oc-PC             | Dmel              | 98.2117 | 1.82908e-21 |
|                  | oc-PF             | Dmel              | 98.2117 | 1.8444e-21  |
|                  | oc-PH             | Dmel              | 97.8265 | 2.61848e-21 |
|                  | CG9876-PA         | Dmel              | 97.0561 | 4.8551e-21  |
|                  | hbn-PA            | Dmel              | 95.9005 | 9.78553e-21 |
|                  | CG34367-PB        | Dmel              | 95.9005 | 1.09067e-20 |
|                  | gsb-PA            | Dmel              | 94.3597 | 2.89507e-20 |
|                  | otp-PJ            | Dmel              | 92.0485 | 1.47322e-19 |
|                  | otp-PF            | Dmel              | 92.0485 | 1.54886e-19 |
|                  | OdsH-PA           | Dmel              | 91.6633 | 1.86093e-19 |
|                  | otp-PC            | Dmel              | 91.6633 | 1.9081e-19  |
|                  | CG32532-PD        | Dmel              | 91.2781 | 2.55523e-19 |
|                  | CG11294-PB        | Dmel              | 91.2781 | 2.87184e-19 |
|                  | CG11294-PA        | Dmel              | 91.2781 | 2.87184e-19 |
|                  | <i>clawless</i>   | BLAST Hit Summary |         |             |
| Description      |                   | Species           | Score   | E value     |
| C15-PA           |                   | Dmel              | 199.134 | 2.88667e-51 |
| Hmx-PE           |                   | Dmel              | 86.6557 | 2.01947e-17 |
| Hmx-PC           |                   | Dmel              | 86.6557 | 2.01947e-17 |
| Hmx-PD           |                   | Dmel              | 86.2705 | 2.42637e-17 |
| B-H1-PA          |                   | Dmel              | 85.1149 | 6.12607e-17 |
| HGTX-PA          |                   | Dmel              | 81.6481 | 6.33582e-16 |
| B-H2-PA          |                   | Dmel              | 81.6481 | 6.3889e-16  |
| HGTX-PC          |                   | Dmel              | 81.6481 | 6.55085e-16 |
| NK7.1-PD         |                   | Dmel              | 81.2629 | 7.06171e-16 |
| NK7.1-PC         |                   | Dmel              | 81.2629 | 7.06171e-16 |
| NK7.1-PB         |                   | Dmel              | 81.2629 | 7.06171e-16 |
| NK7.1-PA         |                   | Dmel              | 81.2629 | 7.06171e-16 |
| B-H2-PB          |                   | Dmel              | 81.2629 | 8.55567e-16 |
| lms-PC           |                   | Dmel              | 80.8777 | 9.07025e-16 |
| lms-PB           |                   | Dmel              | 80.8777 | 9.07025e-16 |
| bap-PA           |                   | Dmel              | 78.9518 | 3.56367e-15 |
| exex-PA          |                   | Dmel              | 77.7962 | 9.30286e-15 |
| lbe-PA           |                   | Dmel              | 76.2554 | 2.77532e-14 |
| Dr-PA            |                   | Dmel              | 75.485  | 4.89465e-14 |
| DII-PB           |                   | Dmel              | 74.7146 | 6.60956e-14 |
| DII-PC           |                   | Dmel              | 74.7146 | 7.74501e-14 |
| DII-PA           |                   | Dmel              | 74.7146 | 8.00786e-14 |
| lbi-PC           |                   | Dmel              | 74.3294 | 1.00312e-13 |
| lbi-PA           |                   | Dmel              | 73.9442 | 1.11805e-13 |
| CG18599-PA       |                   | Dmel              | 73.9442 | 1.11805e-13 |

*Lim1*

| BLAST Hit Summary |         |         |             |                                     |
|-------------------|---------|---------|-------------|-------------------------------------|
| Description       | Species | Score   | E value     |                                     |
| Lim1-PA           | Dmel    | 233.417 | 3.61509e-61 | <input checked="" type="checkbox"/> |
| Lim3-PF           | Dmel    | 137.117 | 3.1635e-32  | <input checked="" type="checkbox"/> |
| Lim3-PD           | Dmel    | 137.117 | 3.1635e-32  | <input checked="" type="checkbox"/> |
| Lim3-PC           | Dmel    | 137.117 | 3.1635e-32  | <input checked="" type="checkbox"/> |
| Lim3-PB           | Dmel    | 137.117 | 3.1635e-32  | <input checked="" type="checkbox"/> |
| Lim3-PG           | Dmel    | 137.117 | 3.46759e-32 | <input checked="" type="checkbox"/> |
| ap-PA             | Dmel    | 136.346 | 5.72067e-32 | <input checked="" type="checkbox"/> |
| ap-PC             | Dmel    | 136.346 | 5.7686e-32  | <input checked="" type="checkbox"/> |
| Lim3-PE           | Dmel    | 135.961 | 7.28673e-32 | <input checked="" type="checkbox"/> |
| Lim3-PA           | Dmel    | 135.961 | 8.25824e-32 | <input checked="" type="checkbox"/> |
| tup-PC            | Dmel    | 116.701 | 4.97279e-26 | <input checked="" type="checkbox"/> |
| tup-PA            | Dmel    | 116.701 | 4.97279e-26 | <input checked="" type="checkbox"/> |
| tup-PB            | Dmel    | 115.931 | 8.20388e-26 | <input checked="" type="checkbox"/> |
| Awh-PC            | Dmel    | 113.235 | 5.78032e-25 | <input checked="" type="checkbox"/> |
| Awh-PB            | Dmel    | 112.464 | 1.01097e-24 | <input checked="" type="checkbox"/> |
| Lmx1a-PC          | Dmel    | 112.079 | 1.08981e-24 | <input checked="" type="checkbox"/> |
| Lmx1a-PB          | Dmel    | 112.079 | 1.10814e-24 | <input checked="" type="checkbox"/> |
| Awh-PD            | Dmel    | 111.694 | 1.37661e-24 | <input checked="" type="checkbox"/> |
| Awh-PA            | Dmel    | 108.997 | 1.07208e-23 | <input checked="" type="checkbox"/> |
| Lim1-PB           | Dmel    | 102.449 | 8.49214e-22 | <input checked="" type="checkbox"/> |
| CG4328-PB         | Dmel    | 92.8189 | 7.43732e-19 | <input checked="" type="checkbox"/> |
| ap-PE             | Dmel    | 78.1814 | 1.81824e-14 | <input checked="" type="checkbox"/> |
| ap-PB             | Dmel    | 78.1814 | 1.81824e-14 | <input checked="" type="checkbox"/> |
| Bx-PF             | Dmel    | 77.411  | 3.12743e-14 | <input checked="" type="checkbox"/> |
| jub-PC            | Dmel    | 77.411  | 3.15363e-14 | <input checked="" type="checkbox"/> |

*apterous*

| BLAST Hit Summary |         |         |             |                                     |
|-------------------|---------|---------|-------------|-------------------------------------|
| Description       | Species | Score   | E value     |                                     |
| ap-PC             | Dmel    | 137.502 | 1.90583e-32 | <input checked="" type="checkbox"/> |
| ap-PA             | Dmel    | 137.502 | 1.98702e-32 | <input checked="" type="checkbox"/> |
| Awh-PB            | Dmel    | 112.464 | 6.96035e-25 | <input checked="" type="checkbox"/> |
| Awh-PC            | Dmel    | 112.079 | 7.7578e-25  | <input checked="" type="checkbox"/> |
| Awh-PA            | Dmel    | 111.309 | 1.35682e-24 | <input checked="" type="checkbox"/> |
| Awh-PD            | Dmel    | 111.309 | 1.49971e-24 | <input checked="" type="checkbox"/> |
| tup-PC            | Dmel    | 96.2857 | 4.26055e-20 | <input checked="" type="checkbox"/> |
| tup-PA            | Dmel    | 96.2857 | 4.26055e-20 | <input checked="" type="checkbox"/> |
| tup-PB            | Dmel    | 95.9005 | 7.20701e-20 | <input checked="" type="checkbox"/> |
| ap-PE             | Dmel    | 95.5153 | 8.23633e-20 | <input checked="" type="checkbox"/> |
| ap-PB             | Dmel    | 95.5153 | 8.23633e-20 | <input checked="" type="checkbox"/> |
| Lmx1a-PB          | Dmel    | 92.0485 | 9.25956e-19 | <input checked="" type="checkbox"/> |
| Lmx1a-PC          | Dmel    | 92.0485 | 9.81649e-19 | <input checked="" type="checkbox"/> |
| CG4328-PB         | Dmel    | 89.3521 | 5.52142e-18 | <input checked="" type="checkbox"/> |
| Lim3-PA           | Dmel    | 87.0409 | 3.02882e-17 | <input checked="" type="checkbox"/> |
| Lim3-PF           | Dmel    | 85.5001 | 8.31256e-17 | <input checked="" type="checkbox"/> |
| Lim3-PD           | Dmel    | 85.5001 | 8.31256e-17 | <input checked="" type="checkbox"/> |
| Lim3-PC           | Dmel    | 85.5001 | 8.31256e-17 | <input checked="" type="checkbox"/> |
| Lim3-PB           | Dmel    | 85.5001 | 8.31256e-17 | <input checked="" type="checkbox"/> |
| Lim3-PE           | Dmel    | 85.5001 | 8.88636e-17 | <input checked="" type="checkbox"/> |
| Lim3-PG           | Dmel    | 85.1149 | 9.98746e-17 | <input checked="" type="checkbox"/> |
| CG5708-PC         | Dmel    | 78.5666 | 9.19328e-15 | <input checked="" type="checkbox"/> |
| CG5708-PB         | Dmel    | 78.5666 | 9.19328e-15 | <input checked="" type="checkbox"/> |
| CG5708-PA         | Dmel    | 78.5666 | 9.19328e-15 | <input checked="" type="checkbox"/> |
| CG9876-PA         | Dmel    | 63.929  | 2.34327e-10 | <input checked="" type="checkbox"/> |

*BarH1*

| BLAST Hit Summary |         |         |             |                                     |
|-------------------|---------|---------|-------------|-------------------------------------|
| Description       | Species | Score   | E value     |                                     |
| B-H1-PA           | Dmel    | 100.908 | 3.3189e-22  | <input checked="" type="checkbox"/> |
| B-H2-PA           | Dmel    | 97.4413 | 3.57877e-21 | <input checked="" type="checkbox"/> |
| B-H2-PB           | Dmel    | 95.1301 | 2.22491e-20 | <input checked="" type="checkbox"/> |
| exex-PA           | Dmel    | 82.0333 | 1.96544e-16 | <input checked="" type="checkbox"/> |
| Dil-PB            | Dmel    | 80.1073 | 6.8708e-16  | <input checked="" type="checkbox"/> |
| Dil-PC            | Dmel    | 80.1073 | 7.34508e-16 | <input checked="" type="checkbox"/> |
| Dil-PA            | Dmel    | 79.7221 | 9.43421e-16 | <input checked="" type="checkbox"/> |
| C15-PA            | Dmel    | 78.1814 | 2.67708e-15 | <input checked="" type="checkbox"/> |
| Dr-PA             | Dmel    | 78.1814 | 2.72213e-15 | <input checked="" type="checkbox"/> |
| CG11085-PA        | Dmel    | 76.2554 | 1.00884e-14 | <input checked="" type="checkbox"/> |
| lbe-PA            | Dmel    | 75.8702 | 1.13384e-14 | <input checked="" type="checkbox"/> |
| lms-PC            | Dmel    | 75.8702 | 1.19205e-14 | <input checked="" type="checkbox"/> |
| lms-PB            | Dmel    | 75.8702 | 1.19205e-14 | <input checked="" type="checkbox"/> |
| CG34031-PC        | Dmel    | 75.0998 | 1.99968e-14 | <input checked="" type="checkbox"/> |
| Hmx-PE            | Dmel    | 75.0998 | 2.21026e-14 | <input checked="" type="checkbox"/> |
| Hmx-PC            | Dmel    | 75.0998 | 2.21026e-14 | <input checked="" type="checkbox"/> |
| Hmx-PD            | Dmel    | 74.3294 | 4.03038e-14 | <input checked="" type="checkbox"/> |
| lbi-PC            | Dmel    | 72.0182 | 1.61017e-13 | <input checked="" type="checkbox"/> |
| lbi-PA            | Dmel    | 72.0182 | 1.72131e-13 | <input checked="" type="checkbox"/> |
| slou-PA           | Dmel    | 71.2478 | 2.91172e-13 | <input checked="" type="checkbox"/> |
| slou-PB           | Dmel    | 71.2478 | 3.08685e-13 | <input checked="" type="checkbox"/> |
| pb-PB             | Dmel    | 70.0922 | 7.16974e-13 | <input checked="" type="checkbox"/> |
| Scr-PB            | Dmel    | 70.0922 | 7.53781e-13 | <input checked="" type="checkbox"/> |
| Scr-PA            | Dmel    | 70.0922 | 7.53781e-13 | <input checked="" type="checkbox"/> |
| bsh-PC            | Dmel    | 69.707  | 7.85893e-13 | <input checked="" type="checkbox"/> |

*rotund*

(gene 1)



| BLAST Hit Summary                   |            |       |         |             |
|-------------------------------------|------------|-------|---------|-------------|
| Description                         | Species    | Score | E value |             |
| <input checked="" type="checkbox"/> | m-PF       | Dmel  | 262.307 | 3.51091e-70 |
| <input checked="" type="checkbox"/> | m-PG       | Dmel  | 261.536 | 5.602e-70   |
| <input checked="" type="checkbox"/> | m-PE       | Dmel  | 261.536 | 6.50982e-70 |
| <input checked="" type="checkbox"/> | m-PC       | Dmel  | 249.98  | 1.89572e-66 |
| <input checked="" type="checkbox"/> | sqz-PA     | Dmel  | 218.779 | 4.16418e-57 |
| <input checked="" type="checkbox"/> | Kr-h1-PB   | Dmel  | 128.642 | 5.85968e-30 |
| <input checked="" type="checkbox"/> | Kr-h1-PA   | Dmel  | 128.257 | 7.52634e-30 |
| <input checked="" type="checkbox"/> | dali-PA    | Dmel  | 114.39  | 1.19231e-25 |
| <input checked="" type="checkbox"/> | dali-PC    | Dmel  | 114.39  | 1.19231e-25 |
| <input checked="" type="checkbox"/> | dali-PD    | Dmel  | 114.39  | 1.2023e-25  |
| <input checked="" type="checkbox"/> | dali-PB    | Dmel  | 113.62  | 2.17415e-25 |
| <input checked="" type="checkbox"/> | Clamp-PA   | Dmel  | 113.62  | 2.19237e-25 |
| <input checked="" type="checkbox"/> | Clamp-PB   | Dmel  | 112.079 | 6.11818e-25 |
| <input checked="" type="checkbox"/> | CG17385-PB | Dmel  | 110.923 | 1.24346e-24 |
| <input checked="" type="checkbox"/> | CG17385-PA | Dmel  | 110.923 | 1.24346e-24 |
| <input checked="" type="checkbox"/> | gl-PC      | Dmel  | 110.538 | 1.72169e-24 |
| <input checked="" type="checkbox"/> | gl-PA      | Dmel  | 110.538 | 1.8715e-24  |
| <input checked="" type="checkbox"/> | Meics-PA   | Dmel  | 109.768 | 2.77014e-24 |
| <input checked="" type="checkbox"/> | Meics-PB   | Dmel  | 109.768 | 3.35618e-24 |
| <input checked="" type="checkbox"/> | CG32772-PE | Dmel  | 109.768 | 3.47008e-24 |
| <input checked="" type="checkbox"/> | CG32772-PC | Dmel  | 109.768 | 3.47008e-24 |
| <input checked="" type="checkbox"/> | Paris-PA   | Dmel  | 107.071 | 2.12164e-23 |
| <input checked="" type="checkbox"/> | CG5245-PA  | Dmel  | 105.145 | 7.29408e-23 |
| <input checked="" type="checkbox"/> | CG15269-PA | Dmel  | 104.76  | 9.93219e-23 |
| <input checked="" type="checkbox"/> | jim-PI     | Dmel  | 104.375 | 1.36378e-22 |

(gene 2)

| BLAST Hit Summary                   |            |       |         |             |
|-------------------------------------|------------|-------|---------|-------------|
| Description                         | Species    | Score | E value |             |
| <input checked="" type="checkbox"/> | m-PC       | Dmel  | 228.409 | 2.51052e-60 |
| <input checked="" type="checkbox"/> | m-PF       | Dmel  | 228.409 | 2.59572e-60 |
| <input checked="" type="checkbox"/> | m-PE       | Dmel  | 227.639 | 3.74713e-60 |
| <input checked="" type="checkbox"/> | m-PG       | Dmel  | 227.639 | 4.00578e-60 |
| <input checked="" type="checkbox"/> | sqz-PA     | Dmel  | 223.787 | 6.44705e-59 |
| <input checked="" type="checkbox"/> | dali-PA    | Dmel  | 112.849 | 1.64339e-25 |
| <input checked="" type="checkbox"/> | dali-PC    | Dmel  | 112.849 | 1.64339e-25 |
| <input checked="" type="checkbox"/> | dali-PD    | Dmel  | 112.849 | 1.72776e-25 |
| <input checked="" type="checkbox"/> | dali-PB    | Dmel  | 111.309 | 4.7024e-25  |
| <input checked="" type="checkbox"/> | gl-PA      | Dmel  | 107.071 | 8.22678e-24 |
| <input checked="" type="checkbox"/> | gl-PC      | Dmel  | 106.686 | 9.64004e-24 |
| <input checked="" type="checkbox"/> | Clamp-PA   | Dmel  | 103.99  | 6.35364e-23 |
| <input checked="" type="checkbox"/> | Clamp-PB   | Dmel  | 103.99  | 6.84913e-23 |
| <input checked="" type="checkbox"/> | gl-PB      | Dmel  | 103.605 | 9.64284e-23 |
| <input checked="" type="checkbox"/> | Kr-h1-PA   | Dmel  | 102.449 | 2.00949e-22 |
| <input checked="" type="checkbox"/> | Kr-h1-PB   | Dmel  | 102.449 | 2.18435e-22 |
| <input checked="" type="checkbox"/> | CG5245-PA  | Dmel  | 98.9821 | 2.22175e-21 |
| <input checked="" type="checkbox"/> | CG12299-PA | Dmel  | 97.0561 | 9.02542e-21 |
| <input checked="" type="checkbox"/> | Meics-PA   | Dmel  | 95.5153 | 2.27873e-20 |
| <input checked="" type="checkbox"/> | Meics-PB   | Dmel  | 95.5153 | 2.49777e-20 |
| <input checked="" type="checkbox"/> | Paris-PA   | Dmel  | 95.1301 | 3.40116e-20 |
| <input checked="" type="checkbox"/> | CG32772-PF | Dmel  | 93.2041 | 1.10296e-19 |
| <input checked="" type="checkbox"/> | CG32772-PD | Dmel  | 93.2041 | 1.10296e-19 |
| <input checked="" type="checkbox"/> | CG32772-PE | Dmel  | 93.2041 | 1.12152e-19 |
| <input checked="" type="checkbox"/> | CG32772-PC | Dmel  | 93.2041 | 1.12152e-19 |

*spineless*

| BLAST Hit Summary                   |         |       |         |             |
|-------------------------------------|---------|-------|---------|-------------|
| Description                         | Species | Score | E value |             |
| <input checked="" type="checkbox"/> | ss-PD   | Dmel  | 266.929 | 1.79906e-71 |
| <input checked="" type="checkbox"/> | ss-PC   | Dmel  | 266.929 | 1.79906e-71 |
| <input checked="" type="checkbox"/> | ss-PA   | Dmel  | 266.929 | 2.00517e-71 |
| <input checked="" type="checkbox"/> | sim-PA  | Dmel  | 86.6557 | 3.36023e-17 |
| <input checked="" type="checkbox"/> | sim-PB  | Dmel  | 86.6557 | 3.7766e-17  |
| <input checked="" type="checkbox"/> | sim-PC  | Dmel  | 86.2705 | 4.6139e-17  |
| <input checked="" type="checkbox"/> | sim-PD  | Dmel  | 82.4185 | 7.00448e-16 |
| <input checked="" type="checkbox"/> | dysf-PC | Dmel  | 62.7734 | 5.28357e-10 |
| <input checked="" type="checkbox"/> | dysf-PD | Dmel  | 62.7734 | 5.37248e-10 |
| <input checked="" type="checkbox"/> | dysf-PB | Dmel  | 62.7734 | 5.69561e-10 |
| <input checked="" type="checkbox"/> | Cik-PF  | Dmel  | 55.8398 | 6.56741e-08 |
| <input checked="" type="checkbox"/> | Cik-PA  | Dmel  | 55.8398 | 7.50538e-08 |
| <input checked="" type="checkbox"/> | Cik-PD  | Dmel  | 55.4546 | 8.8684e-08  |
| <input checked="" type="checkbox"/> | trh-PG  | Dmel  | 54.299  | 1.78744e-07 |
| <input checked="" type="checkbox"/> | trh-PE  | Dmel  | 47.7506 | 1.60463e-05 |
| <input checked="" type="checkbox"/> | trh-PA  | Dmel  | 47.7506 | 1.63164e-05 |
| <input checked="" type="checkbox"/> | trh-PB  | Dmel  | 47.7506 | 1.70115e-05 |
| <input checked="" type="checkbox"/> | trh-PC  | Dmel  | 47.7506 | 1.75888e-05 |
| <input checked="" type="checkbox"/> | trh-PD  | Dmel  | 47.7506 | 1.77362e-05 |
| <input checked="" type="checkbox"/> | Cik-PH  | Dmel  | 47.7506 | 1.78848e-05 |
| <input checked="" type="checkbox"/> | Cik-PG  | Dmel  | 47.7506 | 1.78848e-05 |
| <input checked="" type="checkbox"/> | trh-PF  | Dmel  | 47.7506 | 1.83381e-05 |
| <input checked="" type="checkbox"/> | tgo-PB  | Dmel  | 46.595  | 3.98431e-05 |
| <input checked="" type="checkbox"/> | tgo-PA  | Dmel  | 46.595  | 3.98431e-05 |
| <input checked="" type="checkbox"/> | sima-PD | Dmel  | 45.0542 | 0.000132482 |

**Table S8.** Taxa used for the phylogenetic analyses with their accession numbers in Flybase or OrthoDB

| Gene groups for phylogenetic analyses           | Coding Sequence                                                                                                                                                                                                                                                                                                                                                                                                                                                                                                                                                                                                                                                                                                                                                                                                                                                                                                                                                                                                                                                                                                                                                                                                                                                                                                                                 |
|-------------------------------------------------|-------------------------------------------------------------------------------------------------------------------------------------------------------------------------------------------------------------------------------------------------------------------------------------------------------------------------------------------------------------------------------------------------------------------------------------------------------------------------------------------------------------------------------------------------------------------------------------------------------------------------------------------------------------------------------------------------------------------------------------------------------------------------------------------------------------------------------------------------------------------------------------------------------------------------------------------------------------------------------------------------------------------------------------------------------------------------------------------------------------------------------------------------------------------------------------------------------------------------------------------------------------------------------------------------------------------------------------------------|
| <i>aristalless-apterous-BarH1-clawless-Lim1</i> | al_Dmel_Q06453<br>al_Anopheles_gambiae_A0A1S4GWX6<br>al_Tribolium_castaneum_A0A139WH33<br>al_Strigamia_maritima_T11YK9<br>al_C_elegans_Q21836<br>al_Rattus_norvegicus_A6YP62<br>al_Danio_rerio_B3DKI9<br>al_Human_Q96QS3<br>al_Mus_musculus_O35085<br>al_Xenopus_tropicalis_A0A6I8S3E9<br>ap_Dmel_E1JGX9<br>ap_Human_P50458<br>ap_Rattus_norvegicus_P36198<br>ap_Mus_musculus_Q9Z0S2<br>ap_Xenopus_tropicalis_A0A6I8QAN8<br>ap_Danio_rerio_B0R107<br>ap_C_elegans_G5EE86<br>ap_Anopheles_gambiae_A0A1S4GZT4<br>ap_Stegodyphus_mimosarum_A0A087T3Z4<br>ap_Strigamia_maritima_T1J7L2<br>ap_Tribolium_castaneum_C0KZ21<br>barh1_Dmel_Q24255<br>barh1_Anopheles_gambiae_A7UTE6<br>barh1_C_elegans_Q22909<br>barh1_Danio_rerio_Q53B63<br>cll_Dmel_Q7KS72<br>cll_Anopheles_gambiae_Q7PQE6<br>cll_Tribolium_castaneum_D6WZY0<br>cll_Stegodyphus_mimosarum_A0A087SV15<br>cll_Strigamia_maritima_T1JC39<br>cll_Danio_rerio_Q8J11<br>cll_Xenopus_tropicalis_F6TEU6<br>cll_Mus_musculus_O55144<br>cll_Human_O43711<br>cll_Rattus_norvegicus_D4A270<br>lim1_Dmel_Q9V472<br>lim1_Human_P48742<br>lim1_Rattus_norvegicus_P63007<br>lim1_Mus_musculus_P63006<br>lim1_Xenopus_tropicalis_A4QNI6<br>lim1_Danio_rerio_Q90476<br>lim1_C_elegans_P20154<br>lim1_Anopheles_gambiae_Q7QHD1<br>lim1_Stegodyphus_mimosarum_A0A087TMA9<br>lim1_Strigamia_maritima_T1J2T7 |
| <i>rotund-glass</i>                             | rn_Dmel_Q9VI93<br>rn_Human_Q5T0B9<br>rn_Rattus_novergicus_D4A633<br>rn_Mus_musculus_B1ASA5<br>rn_Xenopus_tropicalis_Q0V9P9<br>rn_Danio_rerio_Q1LXQ0<br>rn_C_elegans_G5EGB2<br>rn_Anopheles_gambiae_A0A1S4GE00<br>rn_Stegodyphus_mimosarum_A0A087V104<br>rn_Bombyx_mori_A0A0C5AMJ7<br>gl_Dmel_P13360<br>gl_Human_Q96JB3<br>gl_Rattus_novergicus_D4A9X7<br>gl_Mus_musculus_Q07230<br>gl_Xenopus_tropicalis_A0A6I8Q066<br>gl_Danio_rerio_A0A8M1QLN4<br>gl_C_elegans_Q966L8<br>gl_Anopheles_gambiae_A0A1S4GKN6<br>gl_Tribolium_castaneum_Q7Z1F3<br>gl_Aedes_aegypti_A0A6I8U353                                                                                                                                                                                                                                                                                                                                                                                                                                                                                                                                                                                                                                                                                                                                                                      |

---

*spineless-clock*

ss\_Dmel\_E1JIM6  
ss\_Human\_P35869  
ss\_Rattus\_norvegicus\_P41738  
ss\_Mus\_musculus\_Q8R4S5  
ss\_Xenopus\_tropicalis\_F7DNN6  
ss\_Danio\_rerio\_Q4U3K9  
ss\_C\_elegans\_Q44712  
ss\_Anopheles\_gambiae\_Q7PM78  
ss\_Tetranychus\_urticae\_T1JYU4  
ss\_Strigamia\_maritima\_T11KB1  
clk\_Dmel\_O61735  
clk\_Human\_Q99743  
clk\_Rattus\_norvegicus\_F1MAG2  
clk\_Mus\_musculus\_P97460  
clk\_Danio\_rerio\_Q8JIG3  
clk\_Xenopus\_tropicalis\_A0A6I8S1B9  
clk\_Anopheles\_gambiae\_Q7Q6R8  
clk\_Tribolium\_castaneum\_A9XCF0  
clk\_Aedes\_aegypti\_A0A6I8U2E9  
clk\_Rhodnius\_prolixus\_T1HDJ0

---
